# Supplementary material for: Development of Coated PLA Films Containing a Commercial Olive Leaf Extract for the Food Packaging Sector
Source: MDPI journal article supplement (doi:10.3390/antiox13050519), 2024-04-26
Supplement: s1 [file s1]

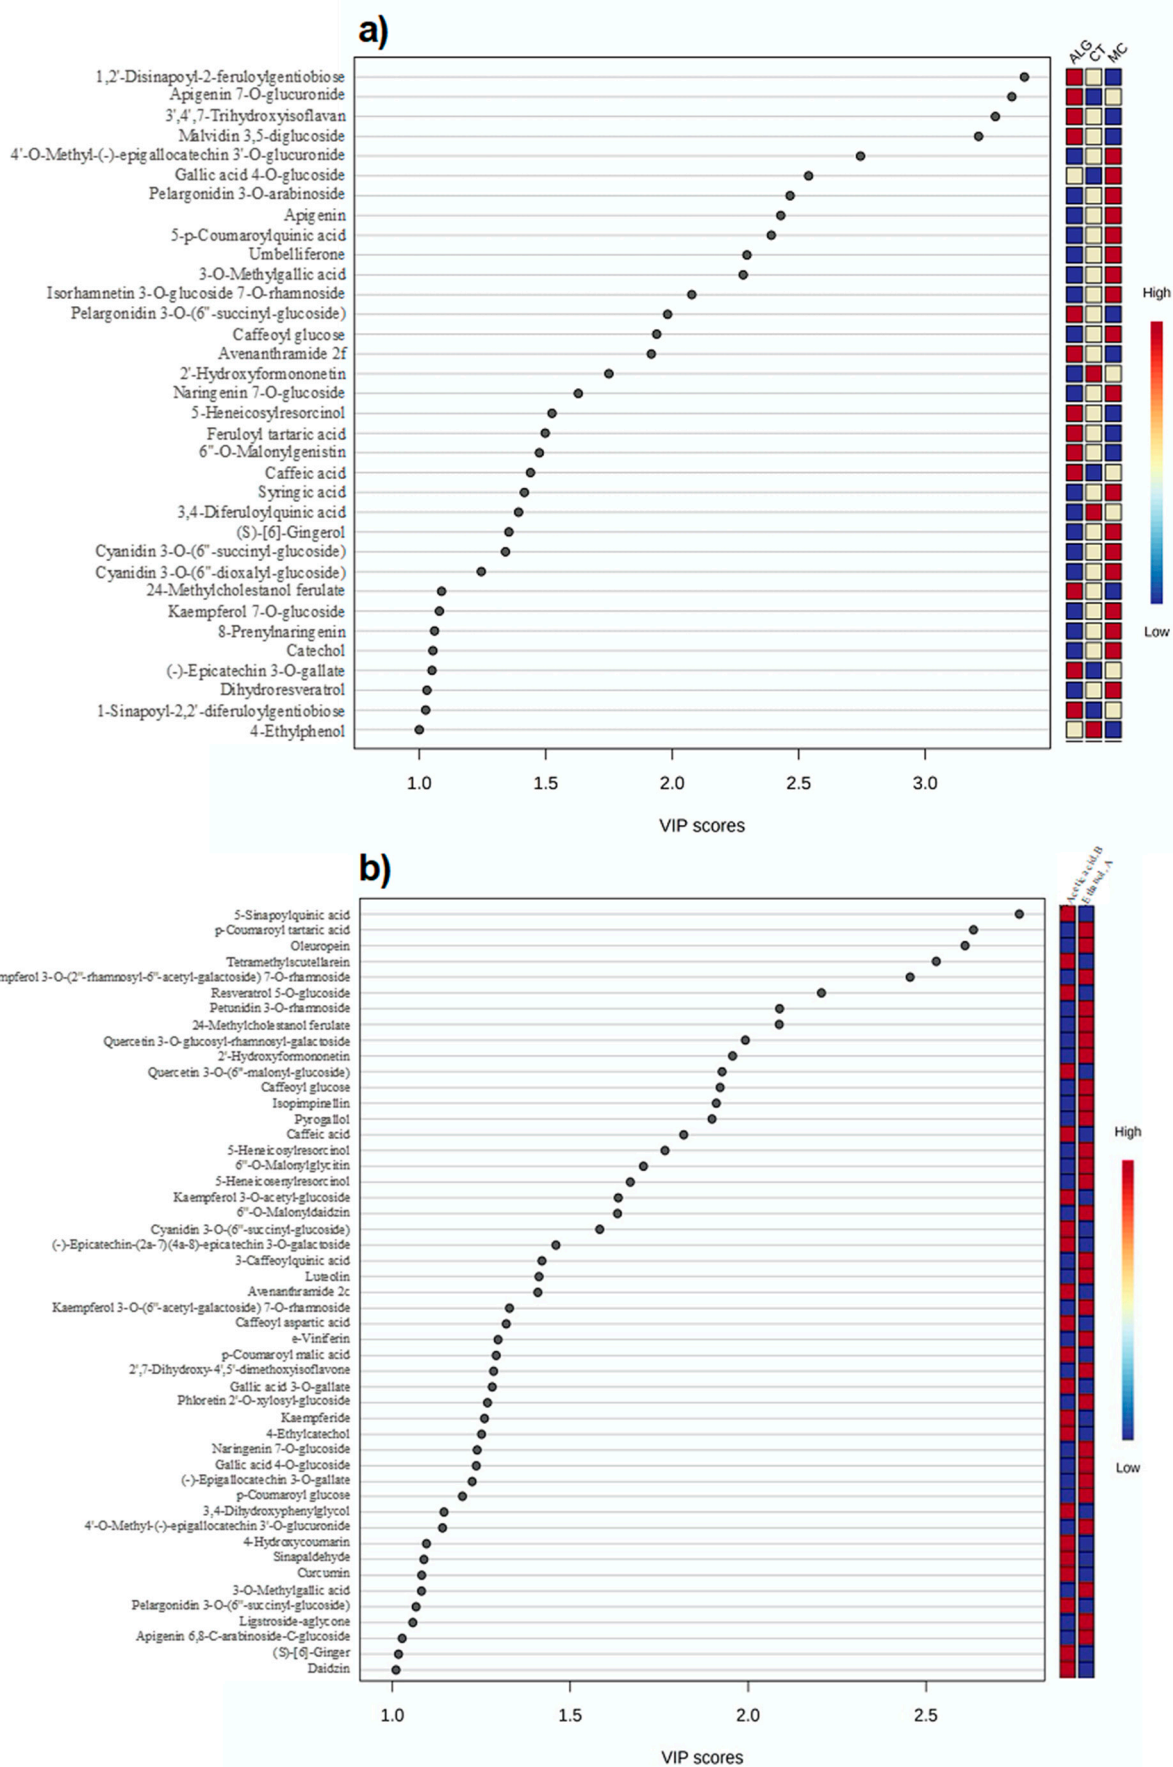

**Figure S1** The VIP scores based on: a) the type of PLA film coated (ALG, CT and MC), and b) the type of food simulant used (A and B).
