# Supplementary material for: Development of Coated PLA Films Containing a Commercial Olive Leaf Extract for the Food Packaging Sector
Source: Antioxidants (Basel). 2024 Apr 26;13(5):519. doi: 10.3390/antiox13050519 (PMC11117849; doi:10.3390/antiox13050519)
Supplement: Supplementary file 1 [file antioxidants-13-00519-s001.zip › Table S1.csv]

Metabolite name	Average Mz	Total score	MS1 isotopic spectrum	MS/MS spectrum	Sample1	Sample2	Sample3	Sample4	Sample5	Sample6	Sample7	Sample8	Sample9	Sample10	Sample11	Sample12	Sample13	Sample14	Sample15	Sample16	Sample17	Sample18	Sample19	Sample20	Sample21	Sample22	Sample23	Sample24	Sample25	Sample26	Sample27	Sample28_rep1	Sample28_rep2	Sample28_rep3	Sample28_rep4	Sample28_rep5	Sample28_rep6
(-)-Epicatechin 3-O-gallate	443.6026	94.8	443.6026:103898 444.60595:0 445.60931:0		6928	8844	32395	300017	45940	241384	291510	98590	119731	214099	48538	250013	0	0	0	239679	131229	248324	109106	164448	227907	439408	362633	292623	2812	2696	0	240870	304198	340601	55976	388103	218410
(-)-Epicatechin-(2a-7)(4a-8)-epicatechin 3-O-galactoside	707.30481	89.4	707.30481:34008 708.30816:16895 709.31152:0		44441	75874	92572	105959	102840	120111	52276	98218	72526	80880	132527	120769	72367	71102	78155	53152	66724	92827	30008	88086	86616	109372	55241	52534	114238	98941	72977	17936	39284	56705	79438	139899	101087
(-)-Epigallocatechin 3-O-gallate	459.25125	98.6	459.25116:40612 460.25451:25933 461.25787:0	75.80828:913 78.40483:926 79.32419:981 82.20152:1021 82.69312:1152 84.84009:1043 113.69024:1209 127.88151:1045 217.14081:1054 233.92992:1203 459.17917:53550 459.24457:2237	4345	2217	4073	40918	36173	81369	273560	376637	167526	55428	22090	99174	0	5836	2022	132279	137960	151332	557043	503324	603899	59968	148060	203686	4597	3492	2406	61415	192222	113117	129173	124004	104623
(-)-Epigallocatechin 3-O-glucuronide	483.23865	97.7	483.2392:592413 484.24255:142007 485.24591:57990	55.0545:1112 67.05439:2137 69.03358:1621 71.04919:2522 81.03349:1935 81.06975:21420 81.83747:1259 82.98859:1006 83.08542:1117 85.02821:1828 85.06422:1258 93.06949:1688 95.04893:1192 95.08517:3616 97.10065:3035 100.88132:1142 107.08492:1719 109.02775:2541 123.11581:25271 127.03841:1907 133.09984:1731 151.11057:3785 169.12086:4622 171.39772:1053 187.1312:4868 192.70709:1275 230.27634:1205 295.15118…	68037	70260	79721	4329510	2986105	2892062	8738854	8104151	10343616	2403300	2928138	3160733	0	4475	2692	3120438	3045115	3070700	8810188	8352610	9630008	2461613	2947669	2897554	1846	4068	1784	3275691	3311890	4939560	3178070	3488878	3206570
(+)-Catechin	291.10196	97.1	291.10229:1022137 292.10564:132244 293.109:26735	50.64134:796 55.0545:1377 67.05436:2276 68.57183:845 68.83806:930 69.06992:1323 78.07642:895 79.05411:1893 81.06959:3324 86.52589:953 90.32101:817 91.05385:1631 95.08511:3559 105.06947:1249 107.08516:1358 119.00732:832 119.08424:1447 119.49744:744 126.22459:772 138.35399:818 158.649:1098 279.07715:990 291.10217:19800	461256	692093	101265	10188318	11663638	10492085	21379742	17189340	12333954	9080730	9856507	10131475	0	0	0	4964464	1020438	10152216	26146606	21845502	2194374	708306	683169	4314870	1640	1485	0	9308159	9319558	11829089	11967880	10248573	10395349
(+)-Catechin 3-O-gallate	443.31082	99.1	443.31082:454985 444.31417:0 445.31753:0		865388	99800	1139094	1116250	46228	649182	1207337	55571	921809	832987	44852	1207673	1501538	40427	1014384	810943	1154529	577136	72843	1210051	843704	1163936	598161	572074	948669	54534	90672	695185	1633895	1254957	39177	862117	1255254
(+)-Gallocatechin	307.11215	97.6	307.11215:1693547 308.1155:250938 309.11886:216244	50.65983:866 54.15265:753 55.05454:1521 56.68481:776 58.33396:796 59.02816:700 59.4549:789 67.05434:935 67.6428:738 69.07011:1502 79.05385:838 81.06968:2571 85.31425:837 89.03851:1025 93.06959:1453 95.08495:1452 106.78429:845 107.08492:1471 147.11639:999 223.16667:1066 307.1127:18414 307.14615:957	1109856	1121203	1028630	10037524	10117245	10523266	16488801	14882347	14638877	9258208	10353843	10473291	25415	58444	71795	8468847	9135900	8991791	14236879	13741189	15403587	8675937	9011216	9241691	46614	118752	154971	10361734	10340528	9753841	10050085	10612170	10401070
(S)-[6]-Gingerol	295.1875	64.2	295.18726:1194698 296.19061:214362 297.19397:206784	51.32593:775 55.01823:4334 55.05457:5188 57.07015:19937 67.05432:4095 69.06997:2572 71.6558:830 73.02859:2035 79.05433:3036 81.03351:2056 81.06972:4726 83.04948:1037 83.0855:3402 85.02833:2410 85.82348:857 91.0537:2215 93.06987:1902 95.04893:3789 95.08522:3411 101.02314:2485 105.0695:3746 107.0852:1721 108.05809:784 108.54251:889 109.02718:1157 109.06423:3528 109.10073:1904 119.04808:1126 119.084…	11412567	11586120	11910813	13357465	11383818	12260559	11466955	12539653	11042190	11877360	12230013	11083608	12959919	13483531	11174227	12263197	10503812	11405552	11756297	11304274	12105744	11433645	11572869	6447802	11681311	11513975	11534175	12395985	11953503	11130448	12552644	12585464	14278259
1,2'-Disinapoyl-2-feruloylgentiobiose	932.28088	84.5	932.28088:386948 933.28423:204115 934.28759:0		2337	2696	15935	149332	32585	138412	123541	147890	36038	1204065	713505	1394432	0	0	0	42901	39711	23020	21373	55468	119106	961661	1043032	1074081	0	0	0	997982	969933	1051537	555572	785922	1083504
1-Sinapoyl-2,2'-diferuloylgentiobiose	901.3573	81.7	901.3573:35275 902.36065:0 903.36401:0		8966	38834	36251	67275	43445	63628	73745	100023	43713	64293	141364	81195	92855	46117	52082	97857	74918	133910	67563	61251	16907	75804	101604	131851	61386	44672	85608	46136	65346	74770	100832	95620	66116
1-Sinapoyl-2-feruloylgentiobiose	725.22089	84	725.2215:905952 726.22485:409508 727.22821:95423	52.62612:1320 58.99026:1238 69.62093:1388 70.06534:1644 71.04929:10018 85.0234:1918 85.02823:14380 93.47958:1582 94.79205:1602 111.04368:1855 129.05344:3379 202.05612:1409 271.05728:215790 433.10672:1778 579.16571:28564 725.22223:26437	3001	17633	15834	4053854	4221654	4410694	10653725	11635979	13157075	3572930	4275458	4533538	9755	2735	2328	4084884	4701567	4552168	11044534	9558619	12743298	3786753	4098961	4288996	4835	2646	1685	4435826	4432121	4282824	4203152	4511043	4493316
2',7-Dihydroxy-4',5'-dimethoxyisoflavone	315.17441	98.6	315.17444:437583 316.17779:64465 317.18115:41419	51.58107:874 66.35684:756 67.57235:727 69.06989:1089 79.0537:946 81.06969:1371 91.05354:996 163.78885:954 185.99001:979 315.17462:14357	813188	7301464	3950662	2628313	4541809	2951635	1431994	3058650	3663881	1703666	2149659	1092028	4292188	3350218	1381695	4038534	5402468	3141923	3356690	3119347	2850938	1413222	7004126	4441533	1159639	4697658	3866966	3009787	3931312	7292420	4735384	3869470	6633604
24-Methylcholestanol ferulate	580.20251	89.5	580.20251:1594276 581.20586:352136 582.20922:63394		3151	3790	4526	613128	562298	338892	707610	926794	869873	855930	1236351	1657881	0	0	1907	8110950	6508654	5242716	2591982	4955996	6157798	520286	8251705	1057651	3258	0	4206	2044263	2226576	2019012	1883376	2191596	2270253
24-Methylcholesterol ferulate	578.10858	93.4	578.10858:243668 579.11193:64171 580.11529:0		41907	49224	102002	573992	343335	547863	687093	570297	835048	778613	916146	349770	0	0	0	490319	925630	744974	296528	645488	616029	1004707	934590	484591	0	0	0	685086	590691	518522	952087	791520	1053493
2'-Hydroxyformononetin	285.12784	98.2	285.1283:746691 286.13165:76415 287.13501:121337	55.05457:979 57.06997:851 57.44634:848 64.94029:798 64.99693:816 67.05435:1755 69.06997:1027 72.69833:707 81.06963:1611 91.05393:1669 93.03489:764 93.06972:1539 105.06965:1021 109.78885:934 119.2287:920 170.08583:868 220.8649:855 239.33141:842 285.12909:6069	3521005	3728423	3659357	4979851	4984206	5931670	6070356	5765482	5324212	3778762	4227218	4151981	3183824	3561147	3873542	7677154	10632712	7488136	7924688	7556958	10803796	5116084	6351270	5621250	3957618	3930409	4660814	5944063	6262850	5286080	5562708	5572078	5218266
3',4',7-Trihydroxyisoflavan	258.89682	87.6	258.89685:1293145 259.9002:57935 260.90356:223262	51.5846:682 51.69824:875 66.71196:862 78.58332:930 122.92335:6300 178.74326:1034	5202	8429	2435	1634251	2044409	1938922	2853545	2820774	2401815	4128235	5508236	5948450	20493	2026	5011	1428616	1447297	1311831	2951853	2642446	3408814	3215901	3481370	2554600	1878	2901	3500	5842300	5875777	5869362	6295958	6067066	6192610
3,4-DHPEA-EA	379.13449	94.6	379.13504:11588025 380.13839:2548734 381.14175:469344	50.73893:4305 53.22717:4713 55.99226:4637 57.83982:5003 58.54663:4853 65.03882:6608 86.82638:4813 90.32309:5283 91.05395:218560 95.04873:62421 98.17966:5424 109.06378:12668 114.08659:5434 117.54087:5321 119.04826:169509 123.04295:14604 127.85098:5163 137.05847:526154 151.03735:52675 165.05305:59843 187.40016:7186 225.07317:10588 255.00937:5594	67590	386106	679967	53655180	53977128	59477792	156404832	168081216	192413008	44570016	57251364	61453152	27165	46125	65320	54400792	64917948	62462920	169515040	148452752	195157456	43577816	46846700	50484860	94422	29549	85533	61589500	62192692	60672616	61578760	63138448	62967640
3,4-Diferuloylquinic acid	545.32404	96.8	545.32404:289693 546.32739:133920 547.33075:75592		3567	5905	3494	427685	482254	488792	1043490	1193301	1495845	241093	189709	322897	2325	11283	8158	780438	976514	940256	1471965	1190627	1676561	414418	306166	269919	2248	5135	4429	477086	472072	394362	461708	412568	249754
3,4-Dihydroxyphenylglycol	171.14761	100	171.14761:11337898 172.15096:1338578 173.15432:212234	50.36423:589 53.00261:10725 53.03901:15062 55.0182:2196 55.05461:244421 55.93495:951 56.0135:9190 57.03378:1725 57.07003:811 59.04927:757 62.25524:717 65.03877:5638 66.04217:1249 66.04657:2589 67.05455:3738 71.06042:909 72.04446:334049 74.09648:1598 79.05416:4155 79.91947:726 81.03326:1131 81.0653:660 81.06993:2849 83.0854:24480 84.04452:2010 85.06516:1247 89.07069:26586 91.05391:5626 92.04939:11…	35410684	14234879	30805800	67315192	65529580	66894820	90322256	70457608	51230308	57744272	67178824	67753880	27174778	21354710	29785562	50107592	64369364	68236232	68595608	60115584	64602704	55004236	51966408	56466420	30386740	8772153	13606851	87699416	73371744	74522936	49494892	67162408	59365388
3,5-Dicaffeoylquinic acid	517.31097	98.1	517.31097:79562 518.31432:28840 519.31768:0		7702	5360	2477	47090	77096	50352	379548	377501	409061	63721	40900	92521	4062	6659	4120	72914	110353	122184	354491	307349	387846	97991	53410	76914	8515	2308	0	68089	141863	126795	106836	132586	126814
3-Caffeoylquinic acid	355.16913	98.1	355.16946:556374 356.17281:110412 357.17617:69016	60.06173:788 65.82864:1000 67.96098:825 79.80365:871 81.06957:1167 81.78991:800 90.4762:841 92.28208:886 125.02149:1633 137.25525:952 194.80986:1095 355.16925:17714	30581	81738	202325	3204126	1535266	3449396	6398458	5563810	5972540	3099363	3555387	1841226	44558	58939	35075	4317022	4822350	4493824	8216377	7712964	8406711	4188444	4755516	4862238	27126	37780	27114	4176887	4506062	3943385	3887886	4235371	4309204
3-Hydroxyphloretin 2'-O-glucoside	453.22827	96.9	453.22888:698380 454.23223:120444 455.23559:52549	52.54674:861 55.05479:1981 55.80121:850 57.48209:940 59.30303:1125 65.29018:906 67.0545:5732 69.03354:2276 71.04928:2504 81.03358:1664 81.06543:1484 81.06989:22008 85.02826:1423 85.06471:2037 89.05949:1249 93.0698:2273 95.04861:1655 95.08516:4275 97.10091:2455 107.08468:1598 109.02779:1640 123.11576:21064 127.03775:2384 148.27486:1223 151.11073:3883 169.12057:3518 181.3904:1119 187.13164:4640 295…	92171	87178	78675	3387355	3369316	3648862	10206679	9914060	11723665	3068350	3627394	3802601	1788	3989	1950	3334676	3942956	3765346	10256149	9039535	12145334	3012910	3360256	3492356	0	4176	2476	3958824	3833612	3778674	3746676	4044266	4006934
3-Methylcatechol	125.09497	99.8	125.095:677328 126.09835:153363 127.10171:228708	51.0233:1551 53.0026:3160 53.03895:2670 55.0181:1021 55.05455:5299 57.39116:560 65.0388:1762 67.05428:774 69.07011:531 79.05411:1265 81.06963:959 90.01052:561 91.05388:1907 92.03728:592 95.04862:1538 120.54153:626 125.09482:848	3129697	5532453	2352651	4305278	7603901	5538832	8806526	7283209	4093196	6005655	6322421	6449721	5367016	6039658	4200540	7437115	5219776	9290914	7267160	6864094	7202704	6731386	6302371	3103728	4468762	6264914	5536316	7368685	6853901	6783852	7457434	7209180	6712536
3-O-Methylgallic acid	185.11301	99.8	185.11301:2305688 186.11636:348132 187.11972:610110	53.03874:712 55.01812:1083 55.05447:2135 56.96495:1760 67.05439:932 68.04957:1976 70.06499:1686 79.05407:1451 86.05988:1323 89.53911:659 91.05352:1248 102.83533:792 113.39385:655 113.99261:785 115.97443:797 177.27173:823 185.1133:978	14275222	3461650	14293092	10265369	10023510	41560400	34287864	34686144	24524780	12623643	15405772	12817938	20439910	16882990	40037236	61019648	56338692	56875032	29565616	15233332	38236820	31749836	10370629	15061133	32289824	16456619	30645608	36524752	33984068	35992088	38092664	36908372	37383860
4',4"-O-Dimethylepigallocatechin 3-O-gallate	487.21005	95.6	487.21027:503101 488.21362:110924 489.21698:49222	55.32838:1062 57.36327:1079 61.19721:1073 72.1907:954 75.7412:1008 76.24097:1134 84.03384:1031 101.64639:1133 117.93846:1180 163.07439:1358 206.74702:1358 265.24655:1220 273.96356:1292 487.20963:39581	27504	27138	45911	3229864	3129184	3188480	7374947	8001809	8181062	2388876	2855270	3114570	3104	3114	0	2864260	3329396	3098078	8918458	7500622	9395440	2539176	2719020	2921325	2856	5341	2629	3113688	3099993	3030472	3047264	3177256	3505224
4-Ethylbenzoic acid	151.07391	99	151.07401:1245793 152.07736:171730 153.08072:453766	50.63581:616 51.02333:2591 52.01847:525 53.00256:1240 53.03895:2266 54.03413:713 55.02943:2006 58.93583:566 65.03883:15692 67.0295:676 67.0544:1928 69.04501:876 74.46154:669 77.03838:757 79.02935:761 79.05431:5844 81.06962:891 89.03819:1258 91.05388:8819 95.04876:3083 105.0025:823 107.04826:1590 123.01366:1055 136.04988:774 151.06001:2810 151.07314:588	1066170	866048	1841030	10309961	9580873	9239676	16201099	14429973	12904592	9139504	9584095	8755471	864586	738757	815108	8960540	9037116	9439735	13225462	11531347	14700407	7622822	8065856	7792996	615304	445499	547592	12502301	12564063	8448541	8837679	9535536	9907162
4-Ethylcatechol	139.4959	89.8	139.4958:31766494 140.49915:0 141.50251:0	53.71104:12550 56.9651:888972 57.93506:92478 61.61586:13685 68.13952:13754 68.45249:241370 68.95216:3052358 80.94482:19510 81.8383:14333 109.34322:15619 116.48029:22042	53644	81631	30413	2766002	1149615	3506226	4494137	4215118	8425114	2575840	1713690	2437702	867230	796044	559585	771280	2004966	1038010	3027014	5930412	1220946	644707	521439	95641	45691	19350	40918	263642224	256697552	272637312	225248480	264626128	254095440
4-Ethylphenol	123.50146	89.5	123.50146:630520 124.50481:892374 125.50817:192531		1250029	231853	298306	515646	993283	963667	1262616	676971	2846245	1506822	422286	1487637	881802	580130	537561	265135	863148	402719	783615	855406	1847664	2162004	564642	421026	381105	718202	495622	698510	1550835	4176484	1481968	1724588	2204669
4-Hydroxybenzaldehyde	123.11578	99.9	123.11587:636475 124.11922:124244 125.12258:158455	50.01573:778 51.02148:550 51.02338:3527 53.00052:585 53.00257:3030 53.03901:5219 55.05474:2170 56.96518:10346 58.9982:2042 65.03886:1255 66.04697:907 67.05455:1480 67.41296:586 67.51011:1240 73.07997:697 76.51535:1710 77.00853:1700 79.0541:5616 80.04951:869 81.06989:3295 91.05408:692 95.01888:752 95.04874:5288 95.49966:545 98.50171:593 99.80032:528 105.0442:759 107.04886:710	745984	503983	574393	2807920	5830784	5959084	12259411	12539209	13859082	5080655	6045619	5793908	422436	318815	493242	5240663	5540580	2766566	10831436	10413394	11641237	2847887	5727432	5952932	623275	595078	358841	6068920	6725186	6299012	6074302	6201928	5934355
4-Hydroxybenzoic acid 4-O-glucoside	301.13766	97.8	301.13806:3826690 302.14141:675373 303.14477:76403	50.95146:1686 51.7338:1530 52.98129:1700 55.90341:1682 66.23544:1686 103.27684:2390 105.60648:1975 127.98756:2183 165.9754:2394 231.98933:2217 301.13879:8727	49950528	7035662	33567932	25648254	32907658	48463732	19092414	34383492	53413228	34430256	9101050	55344328	49124004	30521360	55204096	52499264	33217548	33660312	11015177	56658544	27744588	47463668	29298780	44066600	48363376	37945856	27415324	57591024	57713608	59810044	57686964	56123380	36036960
4-Hydroxycoumarin	163.14655	100	163.14655:539494 164.1499:94485 165.15326:97367		517254	1046238	665701	1588473	2289016	2267132	3788190	1595512	1219712	1575401	1209121	2508747	492262	399778	353069	1424597	1412906	1119462	2628011	1192992	2581348	576775	991913	414339	1009376	223413	729809	2341868	1173045	1687054	1398491	1386680	1345924
4'-O-Methyl-(-)-epigallocatechin 3'-O-glucuronide	497.26633	97.5	497.2673:1359191 498.27065:357797 499.27401:70587	61.37054:1045 80.81334:973 120.10191:1050 121.78772:1167 129.41766:1109 145.77345:1222 164.70755:1123 205.899:1223 321.12384:1111 341.06833:1404 366.88748:1251 448.00269:1277 497.267:95863	12950	9543	6212	9758860	10218943	11400030	128114	140844	318450	21090	61311	33469	5828	21116	20886	48610404	42432884	47223316	236274	8279915	202159	1690547	2592052	2411362	3444114	24248540	53858852	8574551	8546325	9909884	9449087	8770523	8354324
4'-O-Methylepigallocatechin	321.11212	96.6	321.1127:1490473 322.11605:178094 323.11941:39367	70.3691:3303 71.93656:3308 119.11078:3150 186.53276:3504 321.11295:39546	286356	56958	361660	7281598	1147560	16500398	33302712	2409718	36868284	14094405	20362430	15687968	0	0	0	15034423	18394272	14861760	38551400	34256772	44536152	13398204	12847961	14330077	0	2219	0	13471933	14300688	15857799	1735852	14718620	15790749
4''-O-Methylepigallocatechin 3-O-gallate	473.19455	96	473.19504:804519 474.19839:202296 475.20175:59718	53.25285:1025 59.20267:982 79.45894:1112 81.17275:917 97.7843:950 98.91465:1085 105.89124:1092 126.22466:1088 129.89912:1195 153.91461:1246 375.68646:1295 410.91098:1256 411.44061:1262 473.19412:53987	83323	128252	64064	4489490	4618854	4793964	10478633	10551828	11053958	3947089	4599422	4827129	6439	5932	2252	4115460	4606261	4425120	9822248	9194171	11281445	3830036	4085556	4252856	3789	0	3019	4771772	4615558	4449008	4560980	4836192	4842860
4-Vinylphenol	121.06362	99.3	121.06387:749806 122.06722:268856 123.07058:823423	50.01553:3467 51.02118:1068 51.02338:15890 52.83413:467 53.00253:2052 53.03896:4649 55.01807:1311 61.02135:614 63.02295:560 65.03883:6105 66.04653:739 77.03848:2869 78.04645:1894 79.05433:652 81.03332:840 91.05379:4148 95.04876:6227 105.04402:1339 121.06429:1485	347719	206271	368057	6407830	6152014	6126464	14562023	15226680	16740135	5208700	6152094	6177670	236014	205022	555901	6084550	6480590	6766311	13730976	12561508	15173566	5243212	5748018	6556748	184235	404982	505575	6876838	6817086	6657843	7421255	7993952	7342376
5-5'-Dehydrodiferulic acid	387.19705	97.7	387.19772:1238329 388.20107:308758 389.20443:629239	55.05444:1064 56.20741:778 57.07023:1154 57.65233:818 59.52842:1009 66.10876:954 67.05432:5172 72.08948:870 83.04897:904 85.02818:1348 85.06448:3695 86.10971:847 91.0538:1136 93.06965:2381 95.08508:34545 105.06913:2467 105.63749:930 107.08501:2928 119.08448:5192 121.09986:2276 123.07943:8318 133.09993:1494 135.11557:3813 147.11502:1244 149.09457:7652 161.13144:1262 165.05211:1221 189.12505:1373 2…	256471	277191	246982	6071974	6379991	6826336	20040534	17955290	19081646	5685778	6931084	7406029	2335	0	0	6068886	7482020	6577033	17153780	15251863	20101086	5591582	6054116	6967144	2508	0	5173	7407276	7580854	6737096	7379124	7735998	7681766
5-Feruloylquinic acid	369.14798	96.6	369.14847:3333101 370.15182:565336 371.15518:162684	74.21761:804 91.37713:916 93.86696:911 98.61143:926 103.33161:1044 119.04803:1472 134.62869:1079 136.42734:1158 147.04292:1153 149.25586:1045 165.05357:2227 261.68298:1043 369.14865:39888	22583	693478	722063	19733356	20167522	21573790	48055964	47155896	49314288	17049540	20034208	21475834	20420	35089	14925	15422043	18666186	18670156	39024832	36463276	44444400	6444262	6260202	7458320	19256	17105	25236	19989566	20592522	19417586	19508212	20553786	20553542
5-Heneicosenylresorcinol	403.7355	99.9	403.7355:60295 404.73885:16571 405.74221:0		43869	19039	57448	34885	40218	76883	66190	51200	10565	57175	54240	38269	21639	31961	12302	58098	135999	132133	36330	67162	259334	173717	146515	56831	139737	96957	104373	72682	81749	75682	83266	107752	69125
5-Heneicosylresorcinol	405.78821	98	405.78821:307491 406.79156:0 407.79492:1979891		84294	4181	67484	205845	0	0	0	0	0	794566	3827	222487	195557	0	476845	170370	798406	627421	0	454415	1403070	1097433	785402	1984877	464294	0	0	92398	53292	113891	0	2225961	1412668
5-Nonadecenylresorcinol	376.05576	82.7	376.05576:77291 377.05911:0 378.06247:0		80898	151888	109086	324307	112158	174198	176528	229405	396560	145163	286272	153659	205465	82460	231392	215662	73354	367867	375705	81513	96228	155541	207412	146555	222476	214028	167094	329664	265514	470019	303717	513382	779482
5-O-Galloylquinic acid	345.07559	96	345.07581:574674 346.07916:66585 347.08252:224477	50.18373:838 57.37078:718 57.3747:775 63.70117:889 65.99393:765 67.05447:921 69.04037:828 69.62238:942 77.33591:939 95.0853:979 97.86735:847 114.24718:1004 157.22507:1094 161.85432:918 215.25848:1117 229.06447:1222 240.27577:1071 327.06604:2290 338.47452:1048 345.07538:8131 345.40692:1114	31425	30062	55147	3480861	3572645	2319870	10183040	10016201	12045676	3161329	3910477	4089773	0	0	0	4760517	5719443	5345172	12095141	11618491	13958437	4647200	5170119	5492198	0	0	0	4996109	5209762	4783805	4704604	4846846	4800814
5-p-Coumaroylquinic acid	339.2836	99.1	339.28375:2204828 340.2871:435136 341.29046:244354	55.05444:5330 57.03367:1523 57.07003:5190 67.05433:3202 67.90914:1153 69.0699:9077 69.58084:1051 70.84387:1239 72.60731:1171 81.06948:5630 83.08517:4260 88.0753:2009 93.03606:4222 93.06941:2520 93.47227:1249 95.08501:3968 109.1002:3810 123.11536:1555 130.06619:1493 167.2943:1457 298.30893:1947 339.28329:44344 339.34134:3711	4523062	4564925	6064910	5363386	13843086	5718835	6955202	7852702	8715094	6048352	4759177	4219974	9259080	3496464	7459804	11878259	7083620	8820706	5888960	7047806	8411802	5043780	3474287	6979154	4112061	5139640	11847256	15118680	11435330	10444818	6582508	7875015	12964573
5-Pentacosenylresorcinol	460.10867	88.9	460.10867:106907 461.11202:950104 462.11538:329202		7767	3343	3633	300658	89346	283594	147445	191805	208213	149528	159775	320205	0	0	0	326996	166683	229734	62831	161571	217583	282612	116006	201427	0	0	0	198796	216921	311350	94905	349827	88053
5-Sinapoylquinic acid	399.13748	95.2	399.1376:534938 400.14095:127608 401.14431:40771	51.09772:1006 53.64038:932 57.06973:982 58.73554:808 64.19172:924 71.08548:1874 83.04888:1279 101.05969:1250 120.49284:1218 127.42759:964 128.96521:1052 137.84671:956 148.18979:978 159.75998:1021 185.99773:917 311.52515:1045 399.13687:10401	50674	88534	103670	4671118	4616954	4673731	5960583	5404222	5187024	4514067	4679986	4961200	16688	19874	37621	1414924	678652	1460994	2251176	2233380	2176046	1385080	1424404	1405424	33543	26449	24297	3548242	3506136	3304896	3421620	3501228	3454680
5-Tricosylresorcinol	434.19742	81.8	434.19769:2184094 435.20104:500444 436.2044:91539	55.0182:1046 56.16844:1145 57.03383:19347 57.06986:907 59.71552:1006 60.10893:974 61.02859:6811 62.37461:1046 62.51955:1026 69.03355:18478 71.01263:1287 71.04905:1597 73.02843:42230 79.10753:1088 81.03314:3340 85.02815:59330 87.04375:4682 90.51165:1077 91.03843:3028 97.02787:32910 99.04369:2235 105.06952:6055 109.02747:4079 115.03817:12353 115.44631:1002 119.08418:1302 127.03777:17114 133.04839:2…	598759	415533	322116	11938022	12316818	12961734	31941266	30547780	33877932	10326478	12540231	13175556	0	0	0	12406914	14270805	13750697	32806312	30304742	37492660	12144473	13068117	13662014	2821	2354	2093	14371907	14287619	13361011	13678665	14720710	14810614
6-Geranylnaringenin	409.17877	91.4	409.17941:2842979 410.18276:621750 411.18612:673129	51.71055:975 52.36609:939 59.02176:889 62.99617:988 71.66365:898 113.69706:1202 145.43312:1093 270.33395:1232 296.96472:1269 303.31686:1089 409.17911:77598	1169635	1103206	1071792	15376369	16037317	16877500	30482980	26924612	27145156	14720689	16653238	17602070	2169	1761	2466	16151018	17828704	17460582	31014998	28943478	33236492	16375400	17436612	17928680	8090	11720	18111	16627282	16792624	16229540	16231738	17421404	17387528
6''-O-Acetylglycitin	489.22519	95.6	489.22614:1065748 490.22949:307600 491.23285:57893	54.68993:1054 55.62331:933 60.45107:961 72.34675:1013 72.72652:1074 80.56599:1130 87.44154:1124 162.07523:1050 212.39287:1222 218.59911:1189 222.99551:1216 367.14642:1335 489.22574:76710	131952	187882	202883	5475654	5564912	6051648	14943060	14772338	17496634	4491210	5533191	5754162	4726	0	0	6208340	7266552	7135099	15783730	14551499	17648668	5339939	5863508	6414561	1849	0	2138	5985338	6221397	5849612	5856680	5936138	6107956
6''-O-Malonyldaidzin	503.30081	98.5	503.30081:157595 504.30416:40233 505.30752:0		422039	401360	394511	500977	460667	552833	513966	750849	460887	591099	317656	571103	468042	463080	472124	709257	635159	627968	574583	601017	842217	622819	658406	598441	603653	561797	662377	500914	557195	551821	550339	574514	587061
6''-O-Malonylgenistin	519.27301	97.7	519.27301:55050 520.27636:19567 521.27972:19447		236873	162447	240608	126704	215907	161200	217138	171533	169414	192974	92402	259846	241213	165926	269078	154164	126164	164122	141838	154209	156530	137713	245156	275117	200718	278730	168766	241062	242064	249835	303315	266066	237078
6''-O-Malonylglycitin	533.21509	94.8	533.21533:670750 534.21868:173726 535.22204:38704	73.56296:6484 111.82224:6343 118.01855:6189 153.62491:6131 376.11047:7743 533.21338:71319	71053	90010	81926	2975547	3157732	3037010	6172714	6335474	5380624	3625185	3867265	3506280	6861	4739	2252	4817674	5861544	5391281	11037414	10386194	11272244	5342778	5117614	5801874	0	2409	8050	5190639	4914425	4559692	4598802	5439015	5413902
8-Prenylnaringenin	341.34958	99.6	341.34958:132116 342.35293:86632 343.35629:0		264682	456779	218268	397368	306009	303664	264064	454975	421247	468887	488315	289669	339837	202111	356894	471167	578257	519320	513682	220562	503596	395608	289107	242068	593324	350016	297233	587438	350840	517090	482145	878107	684628
Acetyl eugenol	207.13586	99	207.13602:5891810 208.13937:868637 209.14273:335064	51.02328:1408 53.00257:1686 53.03901:6738 55.0181:1650 55.05451:6553 56.07694:718 57.03366:940 57.0702:1163 59.04912:697 59.1134:809 59.99068:2121 65.0388:30213 65.73849:872 67.05446:6337 69.06989:1892 77.03875:1102 79.05418:25553 81.03307:1081 81.06969:2623 82.22376:733 89.03838:1420 90.22296:803 91.05387:129099 92.06172:2927 93.06956:4751 95.04875:9578 95.08517:1257 103.05359:6124 104.06146:170…	2617943	2463820	2541290	26660318	28163846	28544472	76779312	75640352	81207240	24135356	29569688	29890408	199112	320929	198939	27954176	32056666	31255420	74876768	68599224	86605712	26979478	28370502	29400768	310263	132418	467760	31990982	31491992	30801116	30560164	32431998	31923596
Anhydro-secoisolariciresinol	345.60056	95.9	345.60056:179365 346.60391:0 347.60727:0		185506	160019	141745	536325	455724	912265	270522	386814	290087	220667	345495	357453	0	0	0	371501	996498	988919	413383	295363	112964	289049	529097	244401	0	0	0	996324	413524	407156	497811	430723	764289
Apigenin	271.18503	99.5	271.18524:1910964 272.18859:232391 273.19195:200342	53.03903:917 57.07021:7002 65.28932:742 67.05416:1076 71.8741:732 79.07916:754 81.06982:960 87.34335:902 91.0539:2758 95.04879:8511 95.08534:963 103.63573:814 105.0938:855 106.22163:793 106.60057:776 140.03275:773 159.0062:759 159.01917:3180 160.1907:989 163.9718:923 203.35249:934 271.18515:15587	17507446	17236666	16878672	19750592	27523492	38464020	13716795	30598272	30531584	17450884	19635448	15589581	30390976	33176924	36396848	18054328	42590444	50582488	30894604	15213059	20586958	27975250	14809160	5033474	14108754	33645588	18284238	30666586	16407324	38166956	37342872	35779852	18349702
Apigenin 6,8-C-arabinoside-C-glucoside	565.18359	91.3	565.18433:620677 566.18768:197348 567.19104:450458	56.45733:1054 68.61335:1152 81.90562:1067 90.6042:1057 104.65983:1228 137.05844:2214 141.04933:1269 141.15588:1279 203.05107:3072 249.06984:1872 385.12161:19846 565.18231:42160	3681	2501	8157	2497829	2497098	2842327	7095970	7362776	8544396	1753746	2301315	2517940	15155	4797	7582	4420322	5348744	5210574	10451263	10137015	12140708	3109306	3315714	3534292	13933	2102	0	3376157	3489480	3220817	3208279	3240645	3125834
Apigenin 6-C-glucoside	433.108	93.3	433.10901:3097764 434.11236:717669 435.11572:131986	59.36266:1078 59.672:833 68.59037:1005 87.0592:1294 100.8209:1027 119.04819:2272 126.96767:1024 135.19621:1075 135.2502:1176 149.02257:1612 153.01701:3863 271.05734:387030 433.10828:12539	159989	161450	328814	15128811	15722001	16334198	41966908	44552888	50201636	14211671	16969732	17523622	58299	40226	14622	14425912	17282734	16380231	39852816	35340924	46788412	13803347	15127231	16043416	38644	71138	66805	16363610	16327619	16271899	16215310	16876626	16960218
Apigenin 7-O-(6''-malonyl-apiosyl-glucoside)	651.276	93.6	651.276:119660 652.27935:0 653.28271:0		4096	16704	19736	108634	137498	81392	489620	210435	251415	22877	139127	152954	16873	10084	4024	72647	207869	236746	427460	386192	534618	138134	80143	68262	4062	3138	6932	130211	139942	96561	173320	196395	173302
Apigenin 7-O-glucuronide	446.88315	81.4	446.88336:1443266 447.88671:118078 448.89007:90680	50.59624:745 52.245:1007 56.79201:967 58.24939:940 70.03708:1008 90.97634:28163 102.83234:1041 106.94992:55219 122.92374:1572 158.96243:4809 174.93631:13748 201.07834:1196 213.48592:1126 226.94841:5698 242.92303:26377 310.91043:2015 378.89627:3116	12478	72674	48722	334496	530229	432351	51705	56944	10866	8287128	10500321	10861664	249858	149819	186765	155590	110096	117782	42289	81495	77296	6898406	7303214	6131598	59930	80195	94086	5784930	6083300	5969694	6403420	6229180	6282256
Arbutin	273.16443	99.2	273.16467:1743891 274.16802:253839 275.17138:70806	55.10046:934 65.40534:805 68.51983:836 69.06996:904 69.58961:839 81.06982:1046 83.64098:1010 90.86361:952 91.05379:1674 105.10924:882 273.16415:42256	27301898	28828998	12126887	24121112	29147610	17961570	29508580	28887796	11201283	12684282	30669964	28377942	14256724	29391096	28903330	12257332	35957316	29265568	27732602	13501356	28470590	28122500	33196276	29037112	29459644	28956470	29319958	30330006	30337232	29436296	30764986	30020830	19331340
Avenanthramide 2c	316.31775	99.6	316.31766:3908405 317.32101:880962 318.32437:138768	51.51865:670 53.00243:1232 56.66538:852 57.07016:32303 61.08436:872 62.0599:920 70.06131:1274 70.06522:33495 71.08552:9518 85.10069:2765 88.07539:34289 100.14935:1158 103.36652:869 106.08559:19988 106.09742:894 124.4235:865 127.72227:874 142.17787:873 149.19305:999 207.40376:1108 219.82045:1067 316.31769:64774	1107633	2040360	2134625	58598048	53735692	50653636	44679852	42338776	46935144	2393881	5760376	3818338	6517728	13088314	4975536	15446332	4190164	2141655	171421344	130072016	136461712	691584	1058885	2963641	10663100	939786	762869	24023160	24381032	24813220	24798460	23568726	23940628
Avenanthramide 2f	330.33298	99.6	330.33279:2405208 331.33614:611443 332.3395:83479	50.52616:724 52.4614:698 57.07021:12091 58.06543:942 67.11986:875 70.06521:21956 70.06891:1498 71.08544:5297 82.18085:944 88.07538:17649 98.9837:1353 102.0908:4297 106.08553:5027 144.5424:904 189.94211:900 195.61319:1070 205.42377:904 226.40709:973 231.77301:920 266.20325:917 269.86493:1056 289.38803:1017 303.91901:1063 312.32214:2507 330.33334:52270	15415837	16253770	16236593	15684429	17450308	17274240	16803820	16691701	17824670	20176742	16569085	16517583	16924386	17241032	16834146	17692620	17611944	16195203	17073266	17089718	17018636	20313394	18088540	18556014	18569154	18140848	17048048	15506534	16068551	20229446	16740488	20152370	20573342
Avenanthramide 2p	300.28653	99.9	300.28653:64267 301.28988:71101 302.29324:0		166296	140798	351144	280508	333803	272641	404885	209201	212368	428276	166601	216519	243244	181424	209341	263246	297747	86069	163493	211563	135625	301032	171619	48426	208299	262479	366127	270078	427563	275898	333534	353124	182354
Caffeic acid	181.02664	98.1	181.02669:776048 182.03004:207551 183.0334:719164	53.03892:815 53.87347:533 53.93937:674 54.94716:2203 55.05455:1367 56.96509:34521 57.93502:1278 59.19517:645 62.92934:849 67.7874:659 70.83094:613 70.94173:3081 71.9519:5290 71.96438:623 74.76521:638 78.99652:827 79.05396:1167 88.9518:1339 95.04887:983 97.00708:12323 98.97481:2998 105.069:798 115.96905:822 116.98508:4766 121.00652:965 131.70099:669 134.99519:11140 139.01663:5359 153.00539:3029 18…	147458	179483	62190	7936734	2028657	4176986	2441311	3920909	3297119	7539048	21066116	15612580	16700819	5531728	11654581	192678	183449	247871	160219	270723	167856	208276	168188	105116	216414	59083	88010	8793131	1566527	9425893	4041250	10101413	2655978
Caffeoyl aspartic acid	296.24008	100	296.24008:319884 297.24343:176291 298.24679:34492		689765	1726071	891332	1862927	861967	850283	1577273	2064195	1447991	432898	970783	2009046	1380066	1760288	484575	1365648	566427	419682	673404	1315090	688615	503182	1317966	925352	445403	2051794	348683	3086434	2361798	2314532	2498307	2223440	1562512
Caffeoyl glucose	343.29156	99.8	343.29193:3513120 344.29528:693679 345.29864:198066	53.04454:804 53.40104:782 54.26896:742 55.05452:2880 57.07018:40835 57.07299:2256 58.0654:8631 67.05422:4226 69.07009:1638 71.08557:19636 71.48344:784 81.06969:7455 83.08532:4770 85.10084:11040 95.08501:16225 96.49062:1027 97.10074:2417 109.10046:9009 123.11562:2336 168.51164:981 183.17271:6103 206.55681:1094 240.22955:84486 252.769:1022 277.19116:959 310.79446:1248 343.29211:2660	23601502	25745826	22127042	31613052	26999892	26752264	24024774	24823446	25701214	26106402	14994830	22735088	26169028	26919710	26742790	37723940	39396164	32765306	37440288	42726768	34465488	24907250	35129944	23399238	49224768	29201286	30044026	31204438	31480156	32873514	30120700	26604754	26454174
Caffeoyl tartaric acid	313.19516	99.9	313.19516:1505620 314.19851:259822 315.20187:74320		100292	114618	106569	2355376	2177108	2262662	6296098	6292945	6577402	2314203	2257664	2607386	62312	49157	26065	3160119	3483288	3520289	8566595	7701874	8972390	3332885	3389759	3488481	86205	77974	72031	3397832	3183845	2906772	3206266	3379694	3377448
Carnosol	331.91235	80.4	331.91235:55482 332.9157:18162 333.91906:0		232537	124442	221995	95714	122665	118205	42229	102070	32920	144785	210809	60859	346236	361039	100114	91243	229671	64136	89271	59490	33130	62299	53438	47407	100508	341058	160863	85770	71253	126249	204960	150548	127953
Catechol	111.11597	99.6	111.11594:188591 112.11929:22994 113.12265:78900	53.00251:914 55.93466:3182 57.93509:28798 59.13334:1006 72.93707:4291 73.93735:1032 83.67092:1055	398108	756362	539201	858284	1098827	251727	1299367	677944	1305241	283104	274632	877399	587255	875112	354969	766928	1099070	1172149	280996	614612	463874	944996	886337	653036	223587	639906	268653	1401826	2238672	868264	376604	1492719	747989
Chrysoeriol 7-O-(6''-malonyl-glucoside)	549.24878	96.1	549.24878:235800 550.25213:70728 551.25549:68934		18468	17638	5279	367896	391210	179926	1080203	1050963	1120276	325796	432526	448659	11223	5499	8336	316660	264348	384062	1132702	985916	1305557	225144	275597	363732	0	2106	8760	454986	452168	454505	501316	441895	440334
Cinnamic acid	149.09462	99.6	149.09462:556749 150.09797:138998 151.10133:389112	51.02327:2867 53.00263:2051 53.03888:2285 56.05:563 57.06077:603 63.02306:770 65.03875:12550 65.0842:539 69.82861:674 71.92928:1140 72.9373:1537 77.03866:771 77.95465:601 78.04641:671 79.05414:2545 87.36284:644 89.0383:1239 90.94702:840 91.0539:7318 93.88834:715 95.04871:3523 103.05383:1010 105.04453:942 105.06951:1476 115.0532:4265 121.02772:756 149.0217:1230 149.09459:714	498855	706061	971899	4606118	5521946	3205004	11482411	10374900	10545886	4308794	2858944	4931669	548492	735860	344271	5075530	4956045	3282063	9794245	9131010	10013217	4882518	2669878	2831161	498058	731686	235226	6132234	5739117	6030108	5364926	5508938	5678834
Coumarin	147.11526	99.9	147.1154:141209 148.11875:25877 149.12211:510042	51.0234:1840 53.00268:1747 55.93469:1137 55.94078:513 59.79823:541 60.87478:669 63.02324:814 64.92743:15588 65.03875:24945 75.02294:1633 75.50886:658 88.2589:573 91.05371:10128 91.42726:628 95.04865:1017 106.1604:697 115.0536:1169 119.04823:1595 123.96322:786 147.04308:1028	177502	227441	163231	678125	340667	237570	512809	445953	1532493	306690	476860	824506	177167	241283	147610	644177	131394	432146	1359772	1133119	1963702	611446	707040	429366	108082	247766	113966	650504	643666	1022667	1172738	372290	542001
Curcumin	369.38037	99.5	369.38037:887582 370.38372:230236 371.38708:34945		5302281	5108395	3896216	2408853	8505196	2915980	6059142	6094388	7585371	4431094	4093388	4079724	1873690	4120706	4359685	4791219	4807940	4153440	3749222	2463665	4331271	3822787	4252724	3147776	2230971	4412548	2170886	5768390	8892062	5504402	5048464	3762368	4235302
Cyanidin 3-O-(3'',6''-O-dimalonyl-glucoside)	621.26862	95.6	621.26862:38907 622.27197:0 623.27533:0		69706	82155	126290	94529	85424	112928	140898	156793	83742	143575	76884	102345	29207	134106	138602	106818	172828	93681	161486	58483	79650	116278	105121	110417	173545	74533	131149	100741	37654	170713	142323	192675	96385
Cyanidin 3-O-(6''-dioxalyl-glucoside)	592.38379	99.9	592.38379:96831 593.38714:27791 594.3905:0		255623	208269	136245	295830	273057	219196	276924	418531	113826	290539	268365	181786	254653	266052	251910	397748	388654	349917	293334	192992	485402	357371	193799	199127	159802	292509	340563	157280	342160	338414	311963	370356	312244
Cyanidin 3-O-(6''-malonyl-3''-glucosyl-glucoside)	697.28149	92.3	697.28149:289216 698.28484:100836 699.2882:77561		20038	6700	8899	461987	460577	532225	1359198	1087923	1246047	404081	418990	498792	12677	5020	7760	435942	500694	461601	1206949	1032411	1390915	436629	439527	446350	2856	8483	8949	473535	551121	461769	488629	530418	476219
Cyanidin 3-O-(6''-succinyl-glucoside)	549.48157	99.4	549.48157:738709 550.48492:340846 551.48828:245426		6382395	78982	7400234	7061967	44898	6890446	2576087	120805	5236764	2060330	76597	3668328	1869858	55192	874746	1599834	1175685	862593	19072	390522	447312	546218	435702	294558	411902	10549	14994	7966917	7594676	5038907	100981	154027	24683
Daidzin	417.24414	98.2	417.24414:88719 418.24749:0 419.25085:0		127135	130719	165074	113952	162232	187981	240784	463124	141233	200010	135678	129478	159435	166804	138078	118753	142132	112146	129737	218782	178239	100187	184964	32914	108172	117321	145497	109668	90414	116398	198385	86278	151853
Delphinidin 3-O-(6''-acetyl-galactoside)	507.1871	94.6	507.18741:2682511 508.19076:580222 509.19412:96367	53.63682:1272 55.05456:2059 57.03368:5465 61.02859:5348 69.03364:54135 71.04908:2071 73.02844:2192 81.03329:3419 83.04886:8250 85.02819:18806 87.04382:7061 91.0388:2056 91.15983:1415 92.33236:1355 94.02768:1594 97.02782:3883 99.04362:11547 103.03822:3157 106.77792:1591 109.02824:1528 111.04335:11703 114.33665:1662 117.05399:1596 127.03806:3341 129.05353:21847 145.04834:2777 147.06375:16601 165.07…	70775	121808	52729	12773894	13892171	14284029	41569740	39422760	47867724	12163956	14604659	15776790	0	0	0	15197769	22841464	18049618	42736992	37880784	47052152	12659916	14388910	15121248	0	0	0	15702948	15687817	15958054	16382207	15599499	15876795
Delphinidin 3-O-galactoside	465.38916	99.4	465.38916:255005 466.39251:0 467.39587:218864		666503	4891	612782	713097	3674	650186	432582	3406	277289	623654	0	602829	156201	0	436315	498935	483195	475911	5016	752445	760125	625781	235312	758246	502489	0	4477	646314	503501	475988	0	539128	462888
Demethyloleuropein	527.24115	94.3	527.242:520778 528.24535:120255 529.24871:35447	69.18011:1065 122.87034:1281 177.05339:1992 180.10716:1131 190.7733:1213 225.45213:1252 280.24774:1330 433.77444:1440 479.91876:1279 527.2417:58824	41090	110196	93410	3049750	2972244	3438371	8172020	8609678	10231410	1363075	2983418	3066358	2073	0	2321	3817541	4066814	4035525	8604799	8113466	10059016	3138894	3460955	3713925	0	0	2856	3674362	3680714	3384630	3272661	3395248	3358497
Dihydroquercetin	305.11749	98	305.11752:437905 306.12087:63874 307.12423:10585	65.14041:875 67.05457:958 73.18385:768 79.05466:816 81.06994:1472 90.19717:875 93.26114:861 95.08523:1411 95.36469:818 126.81848:776 244.49438:925 305.11719:11670	9400	11687	34433	2460528	4427506	4999766	11364133	758590	7347720	3019724	1622885	1865086	0	0	0	2236197	5046537	2825018	10949777	11521328	1300909	3475663	3452300	3691593	1457	0	1658	5519761	2819552	5031750	4476698	4743256	5163899
Dihydroresveratrol	231.15686	98.8	231.15686:224918 232.16021:236035 233.16357:188722		1248936	798386	2001603	649535	1371888	1051540	949764	1075642	986367	550379	1502423	407822	978766	1495782	832222	1273821	644184	1091318	720066	761301	647020	833038	585206	1013047	1428108	1400130	1709204	1039531	1243325	1506388	1166245	1044142	1581170
Dihydrosinapic acid	227.12538	99	227.12544:819359 228.12879:122528 229.13215:81606	53.03893:3051 55.01809:2478 55.05457:20629 56.10773:668 57.03372:1515 57.37685:649 60.2965:675 65.03855:870 67.05428:4156 68.0495:1267 69.06992:2083 71.28333:728 79.05408:7369 81.06967:5008 83.04909:2264 83.08506:1717 91.05386:2134 93.06922:1269 95.04861:4741 97.10069:2448 100.53384:762 103.05389:781 105.0443:896 105.0694:1610 105.611:654 109.10033:819 111.0459:777 115.57235:650 116.65401:756 117…	3201960	2868518	5269186	6390232	6337052	6081674	9575033	9684577	7814664	6417242	6514624	7126505	4624396	5111290	5740807	6732318	8363182	6911044	9874008	9608842	12259736	6649740	6603438	6471445	5792882	6521502	6472590	7684270	7563521	6855658	6738010	6856560	7228579
Diosmin	609.17517	88.1	609.17584:691389 610.17919:250200 611.18255:49085	70.06509:1960 71.04903:5599 85.02811:10820 86.59749:1249 127.83892:1128 147.04332:1541 169.08478:1258 169.13452:1325 215.50877:1583 263.75497:1459 293.18307:1483 301.06784:166255 316.6123:1495 419.62677:1597 454.52219:1719 463.11862:28056 585.146:1454 609.17487:13809	2563	3463	2494	3423259	3470534	3664106	9327956	10223154	11676077	2943621	3606975	3761984	8027	30585	9908	3195909	3851792	3669414	9737538	8316368	10970973	3038751	3318890	3419620	6721	4382	10368	3611297	3763269	3493031	3427642	3773609	3674720
Ellagic acid arabinoside	434.87802	84.1	434.87802:527578 435.88137:68667 436.88473:112595		4634295	2946790	4518180	4509367	4608152	4428069	2427212	4461900	4365143	2753557	4117002	4324228	2982956	4550659	4217044	2683452	4446815	2619373	2970345	4812302	4604972	2291558	4201238	4532532	4415276	3089918	2596611	4486582	4561912	4702730	2726334	2243379	4620762
Esculetin	179.14114	100	179.14124:904442 180.14459:173666 181.14795:232547	51.02337:3519 53.03901:2223 55.01811:631 55.0547:644 55.93496:802 57.61956:852 58.36371:555 59.04939:1774 60.96653:713 64.87144:612 65.03868:4356 67.05458:2562 67.93503:776 77.03837:3441 79.05436:2914 81.03371:736 88.02111:879 89.03852:856 89.47383:901 91.04175:1043 91.05398:5338 92.06334:740 94.28822:719 95.04888:2878 96.00262:3926 105.03281:1094 105.04404:804 105.06939:700 108.00214:9130 108.00…	521823	583135	641032	5364728	5583042	5477938	10425837	10404968	11318844	4166459	4835074	5314267	632805	244352	438407	4954058	5193718	5130271	9943439	9399133	10962724	4795272	4745090	5020709	193982	312642	272412	7415316	6035740	5374435	5580450	5543382	5709790
Esculin	341.15381	98.3	341.15363:995708 342.15698:166492 343.16034:35215	50.05825:768 50.35987:741 72.78136:874 77.26759:895 80.02307:1784 81.06964:1017 86.09643:1069 88.56082:1142 93.39612:903 102.51573:1246 111.27264:986 112.07625:889 123.04031:2166 207.11612:1077 209.07639:1255 225.10764:4987 238.06839:1027 241.10136:1828 279.57846:1150 293.30331:1033 296.45377:1089 322.24365:1006 341.15332:7168	4515199	4093792	5231952	2954146	2259951	2458709	11722880	12229109	3496966	3377161	2738192	7269906	3981835	3479525	2466180	7545470	1367641	8532672	12324292	10004007	4238058	10376100	3311636	3712214	2917180	12691632	1562575	3317908	3083728	2674558	13240809	12858103	10451979
e-Viniferin	455.12714	89.5	455.12711:779676 456.13046:159640 457.13382:49953	56.26629:847 82.48594:974 99.00561:1326 145.02676:1658 177.05194:1203 207.37056:1465 377.72919:1231 413.62384:1381 455.12628:20982 455.21869:1931	1087004	1068730	1043891	5910917	6153300	6317690	4574782	6893609	6961464	5743879	6210322	6407942	3304	0	0	6162464	6499936	6233897	7275292	7328280	9037153	6245650	6507202	6630911	1490	0	1822	6924974	6689215	6412218	6480642	6693360	6754474
Ferulaldehyde	179.49161	91.1	179.49161:34995 180.49496:0 181.49832:0		62807	97483	81724	68599	99527	64771	85459	67223	23686	65616	63972	68001	55052	119305	100304	40054	81170	37471	127099	33654	15209	37148	66364	46325	65900	37063	24010	37407	59693	23813	109744	114050	104281
Ferulic acid	195.17241	100	195.17245:535938 196.1758:162491 197.17916:107006	51.02317:622 51.50004:749 53.00244:1525 53.03884:2703 53.08414:705 54.02172:594 55.01811:1184 55.05465:8132 57.07002:920 58.96988:732 65.03848:1324 67.05437:5430 69.03333:925 69.06982:2890 70.06519:1944 71.26894:662 77.03883:734 78.04647:710 78.75281:746 79.05404:4861 81.06982:4368 83.08537:777 89.0382:1969 91.05415:4609 93.06932:3205 95.04869:3372 95.08505:3535 105.04371:1456 105.06896:1276 105.…	272952	299391	246635	3440589	5830236	5736426	13174849	8334710	13856576	4987164	5581586	5619656	341487	149336	118307	3196502	2873668	1089887	10449429	9689347	7066036	4337272	4747055	4787427	191219	236745	222099	6346205	6823388	5842702	5402054	5730498	5566018
Feruloyl tartaric acid	327.0047	93.8	327.00513:2173271 328.00848:226575 329.01184:2089393	52.59332:1186 55.05455:2999 56.46102:1026 57.07019:3688 71.04897:1751 74.09601:1090 77.01518:1618 80.57884:1086 83.04897:2083 93.06898:1424 95.0853:1726 98.9837:272281 99.09113:1308 108.31377:1155 116.99384:11920 174.99049:4889 189.59619:1284 217.26508:1320 226.85796:1528 250.99637:2580 327.25052:2050	29670458	17796612	4451170	17396984	13578182	16945990	28934130	18577384	13837059	29797832	31831840	30971606	17676380	32398432	15681807	30623988	31526430	4749558	32076618	18144476	15914749	18881968	15510107	31525638	29437216	32550356	5894289	30808440	31148594	30908514	32001904	31142662	19425434
Formononetin	269.24463	99.4	269.24463:199151 270.24798:101515 271.25134:90172		364680	565273	541492	549468	312822	387179	1061662	692168	491806	236401	347206	496276	418787	632979	314739	246948	289287	341108	293353	495756	575627	349866	360693	472512	387945	473780	367331	652524	307435	542642	413452	350558	584809
Gallagic acid	605.25238	98.2	605.25238:72735 606.25573:0 607.25909:0		26298	7294	13953	99228	45922	54414	283612	210355	123136	36213	75555	53284	20324	5719	0	59585	64355	93311	111146	116722	279720	40492	119183	93664	3765	4369	4709	112670	126037	84320	81286	105253	155929
Gallic acid	171.1004	100	171.1004:10266703 172.10375:1153745 173.10711:389710	53.0391:12367 55.05462:205822 59.97184:6086 65.03911:8209 67.15388:5236 72.04447:266680 83.08543:14972 86.82537:7335 89.07059:16363 93.05719:10483 94.06039:14092 97.38199:6461 112.08303:5954 138.01987:6140 171.14774:18986	43845896	24139204	11751529	45511264	20341936	46078900	27281004	61176836	48164848	19218932	34322376	14371487	16378149	6442190	21362826	9431237	19870790	10819248	53346916	33090240	54341860	65399300	12012270	20447652	18278862	8931541	16085109	37040824	86153672	22160070	25959792	28068270	49798504
Gallic acid 3-O-gallate	323.1069	98.7	323.10709:1045071 324.11044:195713 325.1138:97810	55.05464:1605 57.07016:1048 67.05452:1420 69.07022:908 81.06984:1946 83.74358:871 93.06942:1577 95.08522:1842 97.68451:895 103.35616:800 145.70824:879 323.10733:11478	79293	107158	145149	6343724	6498521	6848251	12325094	9287421	8575710	5491571	6443266	6721308	0	0	2019	4299335	4882904	4611036	8439165	7266312	8933428	4031377	4426363	4496702	3677	2187	1909	5822862	6005122	4995211	5042558	5307889	5265648
Gallic acid 4-O-glucoside	333.25977	99.9	333.25977:381614 334.26312:69605 335.26648:90918		45829	94052	83574	2238840	2459237	2409272	119418	482145	245678	937798	529301	1163432	89272	72648	116055	2305804	2517606	2527781	1572692	1862879	1397359	1777582	1431885	1415419	81946	103648	99002	1177295	1171472	1246766	1188887	1246217	1110187
Gallic aldehyde	155.06879	99.8	155.07999:1029694 156.08334:175460 157.0867:203782	53.00254:976 53.03901:1617 55.05452:3864 55.93467:11158 65.03862:680 67.05424:2126 68.04937:966 69.06974:818 70.06517:17994 71.60796:659 72.93711:65459 79.05413:1158 82.06493:4107 85.03941:1442 87.17719:685 90.94729:31271 95.04887:727 100.19192:717 107.08771:665 108.57521:716 108.95754:11819 113.96276:2058 131.97295:2087 138.19221:666 146.53511:706 155.07962:2083	1774452	2264447	1306285	6420120	6441168	8063754	12109275	9075693	6050613	6146706	6531522	6904768	1439404	2449002	1289984	5843504	7306130	5824328	9090438	9296277	10433007	6251218	5998734	7633671	1490336	722647	729688	9325349	8417122	7151275	7245903	8192386	7252119
Hydroxycaffeic acid	197.11533	99.8	197.1154:2687790 198.11875:407318 199.12211:245018	51.02336:1185 51.59489:655 53.00263:991 53.03901:4807 55.01809:1488 55.05467:4803 56.96484:835 57.21593:574 59.04952:685 61.15764:661 64.39145:603 64.51522:671 65.03873:5616 66.04669:634 67.05436:6206 70.06523:4228 72.08081:900 72.93736:1758 76.7994:748 79.05415:9669 81.06979:2874 88.17875:822 90.94744:982 91.05388:24592 92.06229:947 93.06939:4004 95.04876:6511 95.08493:1141 98.41279:690 103.0536…	938483	1816330	925448	21052488	22139676	22877520	56893988	55470628	64797016	20587534	23131140	24098120	553740	281637	649221	20359492	22976240	22078514	53510748	48945040	62873448	20039134	22106362	22500122	575719	368004	494813	25187712	25982252	24840404	25538348	24199408	24584938
Hydroxytyrosol	155.50316	89.4	155.50316:2578054 156.50651:0 157.50987:121754		317114	81957	183706	3118335	2497790	4073490	4648404	6756864	7330504	6605968	3731192	3826203	659197	1006083	1168628	1185568	2911546	2343062	4335106	6165363	14589305	2052005	775616	364697	629450	386822	488920	5644230	5369250	5883785	4472112	5476756	5256312
Isoformononetin	267.08124	61.2	267.08124:636418 268.08459:63801 269.08795:12091	55.0545:2513 55.78635:629 57.07005:1594 67.05424:2197 69.06988:1458 72.53104:745 75.4096:733 79.05416:1412 81.06967:1980 95.08501:1649 100.5817:802 181.62125:771 213.46518:853 233.83028:868 267.08035:1420	18523	32470	91938	9336987	9211806	9948970	22375750	22978078	3588330	4010923	9183675	9603386	14623	41643	7572	3760226	4754438	4340970	19068776	16894052	10142780	3584996	3601970	4249458	26117	29511	8088	11080072	11093379	9721789	9949728	8704724	8582880
Isopimpinellin	247.15144	99.5	247.15147:588302 248.15482:55441 249.15818:160162	53.00262:1908 54.56442:585 55.01815:811 55.0546:4456 55.10809:750 56.58766:705 67.05424:871 69.06994:28258 73.06477:5005 79.0543:1420 81.06985:968 91.05437:935 97.06458:1001 107.08566:785 115.07458:3231	268910	144077	95854	5137404	5319520	5108592	2927106	4071310	3951696	4287184	4194297	4536635	92253	274547	134699	8139739	6872468	7391568	4645593	4699608	4788200	8839273	6492446	6688429	6478444	7096868	8207420	4770090	4825898	4712880	4732404	4802174	4729135
Isorhamnetin 3-O-glucoside 7-O-rhamnoside	625.31299	94.7	625.31299:79914 626.31634:41823 627.3197:0		218317	135222	79361	176956	98837	139897	169083	212874	159777	36309	116820	206709	126060	65979	105975	238852	514116	422742	141709	38867	37084	91607	80916	147467	153312	65857	232054	243948	157121	45743	210627	99158	140722
Isorhoifolin	579.16504	88.9	579.16553:717954 580.16888:260107 581.17224:61677	54.89562:1138 56.75982:988 62.23964:1341 71.04924:1660 85.02818:2019 156.45848:1366 188.41693:1267 210.41257:1505 271.05737:184940 356.74945:1337 433.11487:1467 476.72501:1363 579.16687:11176	9456	9328	11772	3932460	4079811	4250515	9883485	11011501	12577917	3427517	4144426	4233564	10988	2232	10681	3676766	4492534	4074556	10574961	8763484	11660640	3450571	3800310	3830336	6518	0	5672	4160324	4266124	4058190	3969838	4263994	4235342
Kaempferide	300.25018	99.8	300.25018:286163 301.25353:68236 302.25689:10840		157727	141231	175095	404730	303279	444962	1148235	1166759	1591398	517939	668513	688968	97984	147712	268552	146689	471449	672561	456327	517316	887296	316240	271978	360006	180794	129089	104563	1114446	1106961	466068	709056	571216	565138
Kaempferol 3-O-(2''-rhamnosyl-6''-acetyl-galactoside) 7-O-rhamnoside	785.23859	84.5	785.23859:105977 786.24194:41567 787.2453:0		25989	16819	8475	4083	5021	2956	6451	12618	21643	17281	5445	2364	2564	3708	0	240127	273427	162189	546767	449258	552662	222570	242016	245377	0	0	2088	149702	132638	119839	85381	161429	111412
Kaempferol 3-O-(6''-acetyl-galactoside) 7-O-rhamnoside	637.53345	99.4	637.53345:912300 638.5368:263303 639.54016:0		3248136	58211	3402968	2260412	60627	3771834	3272480	60924	1715448	1563855	90399	1272787	704077	15313	601164	724460	534604	309131	7772	377962	350287	46023	189264	204982	83228	3522	11091	4577780	2410308	830701	47099	66093	491
Kaempferol 3-O-acetyl-glucoside	491.17059	94.5	491.17142:745429 492.17477:204744 493.17813:47559	51.73893:1010 60.27488:1152 60.73074:918 69.0333:1505 73.48926:1182 80.36057:1173 80.5174:1243 82.80099:1061 85.02818:2497 119.04839:8102 120.41792:1202 121.39994:1166 132.89125:1160 147.0426:131361 165.05249:4289 194.13344:1369 292.89212:1258 309.09482:3349 378.62158:1280 491.23212:1791	22230	34499	31666	3744101	3988332	4120714	11102187	9312826	9953010	3456083	4274929	4357859	0	2194	0	3553652	4331414	3937349	10468016	8968487	12195308	3362503	3636837	3742730	0	4016	4667	4392196	4381024	3904819	3915744	4412546	4444258
Kaempferol 3-O-glucosyl-rhamnosyl-galactoside	757.25995	86.4	757.25995:101423 758.2633:20432 759.26666:17870		10080	26122	30118	168464	98950	92404	267715	119523	194222	37623	120863	143130	7431	12755	13867	159398	175553	167123	519440	471129	380560	87425	76471	310444	6020	11344	3990	256540	163723	227769	199182	234112	280123
Kaempferol 3-O-rhamnoside	432.23358	97.9	432.23358:4226594 433.23693:1053116 434.24029:201964	55.55147:1549 58.43586:1363 69.03357:9767 81.03304:1931 83.04917:1637 85.02813:3041 93.06945:8838 105.06924:84626 105.5167:1623 111.04327:3169 114.01644:1586 119.04808:2022 121.06393:25313 124.92458:1421 129.0533:3648 135.09714:1839 147.06393:1521 236.29791:1618 267.11908:1863 365.50754:1829 387.17621:7391 432.23334:4101	356228	403221	64400	278074	230783	159797	118731	448745	1743937	252666	147854	131407	2460277	802709	51276	498730	71049	33928	130424	46027	1004557	428051	280516	412675	154446	254279	252336	41977320	38836572	36744688	36099768	36992944	35846536
Kaempferol 7-O-glucoside	448.28598	98.5	448.28598:307918 449.28933:44542 450.29269:0		1126256	1643792	1414984	2026122	1380819	1030748	264034	1886836	1333698	1474561	1027931	590692	1074576	1218735	1223248	2318352	641864	1292628	1375849	1606415	740121	1162106	1422730	1718342	1286618	2106199	2988738	695129	2329738	1517951	2732618	2413426	1458102
Lariciresinol-sesquilignan	557.23615	88.3	557.23615:253951 558.2395:31585 559.24286:698660		48766	7903	18210	385548	846778	725527	1481035	1474334	558952	545643	838179	833174	3138	6832	0	226071	247565	752594	989625	1707157	2037780	444232	914863	928918	9236	3090	0	487493	866467	453750	797725	928554	969841
Ligstroside-aglycone	363.13995	94.8	363.1405:668425 364.14385:162573 365.14721:26150	56.7452:877 56.95451:871 65.0389:1119 67.74886:972 69.06996:1349 74.30941:962 77.50636:994 78.42982:988 89.63651:832 91.05391:31924 107.04865:864 109.0639:1981 119.04824:17821 120.74879:934 121.06366:1122 132.61662:1017 134.83188:953 137.05844:49726 153.24307:1029	10938	59505	39057	2746756	2793874	2925034	7829569	8318144	9482040	2332611	2967662	3163658	14065	8217	12446	4560922	5364388	5276244	13479537	12437882	15728396	3703232	3960151	4312600	20471	12425	24862	4146655	4224027	4074326	3942949	4394232	4332206
Luteolin	287.10745	98.2	287.10745:671696 288.1108:225459 289.11416:726211	50.53312:685 52.03355:808 55.05445:903 59.93118:748 61.53106:847 66.37508:788 67.05418:1329 77.84263:967 81.06966:1751 95.08486:1475 105.06948:1190 108.08031:826 135.11562:889 284.06427:907 287.10776:9005 287.17404:976	2309	1919	2124	71771	30410	76893	187528	122305	280121	67653	26449	101594	0	1978	2050	329714	376838	369323	859167	3507709	791253	346223	4572128	329870	2248	0	3572	4271450	4215288	4090492	4145688	4205362	4231212
Luteolin 7-O-(2-apiosyl-6-malonyl)-glucoside	667.22168	90.7	667.22247:8280786 668.22582:2287036 669.22918:661121	56.92159:2900 57.03387:3520 61.02864:11704 69.03366:12401 80.14557:2586 83.84094:3236 85.02824:311177 87.04388:5303 91.03872:31356 93.06273:2940 97.02794:59572 99.04362:9830 109.0274:20406 113.69777:3273 119.21792:2878 127.03793:133585 145.04822:369255 151.96263:2866 163.05858:123037 194.88422:3176 195.07591:2857 221.92719:2873 271.07816:4555 289.08905:11476 291.39935:3498 325.10965:137560 487.16…	4449881	3825947	3948257	60076924	59370576	62035092	124759592	121078552	138639008	53849212	60091508	63145080	0	0	2080	65058880	84780216	71946848	157568208	120764128	54157280	58307708	59801532	63226760	51261	33087	77316	67252520	69758208	68016128	66402456	66490808	68610656
Luteolin 7-O-glucoside	449.10251	93	449.10342:13836273 450.10677:3346177 451.11013:618642	53.03742:792 59.31035:991 60.10078:1126 67.69665:896 71.9806:1020 72.04429:1375 74.8763:1077 136.41306:1176 140.80826:1227 148.09689:1616 153.01711:2640 221.11823:1148 287.05209:307083 294.6796:1182 296.4296:1288 399.58722:1345 449.10022:10933	677199	1106736	1405476	70637400	73390424	76454632	184529792	193656000	215093936	64829768	77536712	81103080	279126	105289	78185	65281368	78369576	74865152	173551440	156810048	194872912	62039716	69350856	71356080	281077	213712	114245	75522616	75305072	71870440	72736800	77420648	76877960
Luteolin 7-O-malonyl-glucoside	535.23065	96.4	535.23108:2561916 536.23443:642891 537.23779:177366	53.7121:1050 58.66554:1016 88.56844:1230 141.35562:1198 157.76213:1300 177.05292:3033 205.06624:2628 218.02402:1325 290.71765:1135 329.12979:1407 535.23083:296276	521963	573273	598522	11400763	11866788	12097609	23407078	22136874	24012684	10382697	12011999	12671746	3942	1692	3069	11891347	13573473	13244120	23112054	21536376	24472054	11498566	12254999	12507462	4670	5342	1654	12864563	13060974	12676988	12578441	13113773	12993275
Luteolin 7-O-rutinoside	595.1593	88.7	595.16052:1056904 596.16387:320950 597.16723:164707	70.06527:3935 84.08107:1462 210.95811:1311 295.0571:8739 307.05679:7402 325.06723:23188 337.0658:14483 347.08545:1615 349.06836:9424 351.08017:1766 355.07773:5925 361.06723:3378 365.09738:3107 375.0827:1623 379.07645:14469 391.07709:8818 403.07709:9192 409.08655:7821 410.32303:1662 421.08698:5867 427.09607:5900 439.09467:3822 457.10971:13587 463.09827:2740 475.11554:4515 481.1076:3135 499.11838:5…	22393	57502	33661	4561382	4671970	4907789	12120279	11528536	12423065	4187983	4880094	5053940	9502	5527	17079	4423302	5097312	4814192	12080098	10560639	14237880	4267277	4501796	4671941	4508	6083	4508	5155758	5030460	4450763	4560540	5187179	5168824
Malvidin 3,5-diglucoside	689.20361	49.6	689.2038:3408825 690.20715:935988 691.21051:386275	59.27187:1837 67.9659:2237 88.63075:2542 90.52428:2493 95.80935:2164 124.975:2207 347.09241:4740 365.10049:6096 509.14301:6399 527.1546:10955 689.20355:207141	4193595	214019	1689832	13512704	12227955	14146176	7875054	13597932	17324328	26180622	21226452	30665570	0	3112	4125	7698965	15415698	14083608	15114274	17513948	10068801	26107458	26938178	27369428	94381	3006	2699	23359878	23281578	24802106	19165010	25112978	26388220
Malvidin 3-O-galactoside	529.14801	93.8	529.14746:561370 530.15081:135055 531.15417:33274	62.39019:975 68.39709:1112 82.41265:1107 84.48486:1056 93.07878:1442 183.36713:1415 427.32852:1373 529.14703:60211	10613	24661	9821	3016802	3051246	3177242	8435943	6569589	6581559	2536190	3153424	3277700	2995	2746	3322	2609517	2999313	2957947	6630471	5519610	7223768	2145256	2331737	2478537	2283	6693	0	3338848	3414936	2635953	2648602	2816536	2862590
Matairesinol	359.70984	90.5	359.70984:50961 360.71319:0 361.71655:0		52285	16697	28059	74804	36129	34077	55396	89030	13570	93224	58465	97795	29831	24650	41667	92126	77600	151648	66096	84136	164706	69832	101228	107018	101018	84207	138084	68538	29657	39293	56453	153746	66737
Myricetin	319.12537	98.8	319.12589:724220 320.12924:112227 321.1326:19846	55.05468:1318 56.91625:721 60.92044:729 65.03874:1288 67.05443:1744 68.97063:797 77.33873:795 81.0697:2006 91.0538:1563 92.04903:3534 93.06978:1125 95.08517:1225 96.08039:869 108.04375:1419 120.04394:1116 126.07408:841 136.03841:3241 138.09018:7086 153.94691:945 164.03305:1648 172.0986:1151 174.12646:1243 182.04305:3434 182.09584:1243 184.0752:966 184.11092:1343 201.13689:3813 209.27948:933 210.0…	76561	99651	42242	3480520	3751827	3904373	9992303	9912673	11457724	3179421	3713889	3906829	5186	0	3842	3540032	4057724	3694366	9214872	8343186	10384430	3385722	3591280	3803105	2742	7017	2283	3949363	3914069	3788732	3793223	3958250	4128399
Myricetin 3-O-galactoside	481.16315	95.7	481.16342:436227 482.16677:110168 483.17013:8878	51.07823:895 57.41483:877 67.26672:881 84.23759:1266 107.64252:1031 115.43576:1073 122.68173:1129 186.06279:4074 317.08075:2098 481.16364:35944	21205	57849	48600	2229452	2224850	2383270	4828911	5214122	5529365	1891916	2210315	2351803	0	3833	0	2804894	3071450	2992490	5365612	4968200	5857864	2449563	2814781	2732132	3912	2554	2503	2539010	2637234	2304724	2485670	2460288	2409748
Naringenin 7-O-glucoside	435.63168	94.4	435.63168:101138 436.63503:0 437.63839:0		15349	3496	3504	131916	22181	212605	124760	43185	130252	112728	78835	184209	0	0	0	171697	354263	342164	70571	190297	226903	103853	150055	108957	2768	0	0	206540	273247	213209	204152	288522	307081
Naringin 6'-malonate	829.27209	82.9	829.27362:19244494 830.27697:7672814 831.28033:2401892	60.05562:2553 61.02859:6382 64.22807:2631 69.03348:4104 73.02837:2960 80.31322:3556 85.02814:271691 91.03841:17427 97.02785:54640 99.04366:3977 109.0275:13549 127.03773:169246 138.34056:3030 145.04803:778894 163.05836:475195 163.07283:4951 181.06787:3754 198.24179:3768 241.02586:3218 243.92084:3497 253.06804:4983 271.078:13900 289.08884:43401 307.09732:4920 325.10944:532008 343.12073:3971 359.656…	7695560	8043923	8249231	124287672	127515232	129852224	249655648	252235888	277495264	109102032	124551576	124682768	0	6635	5665	79597640	139208336	139045408	250168848	240914480	295224448	117393320	119641616	126929688	70224	121196	290447	131275968	138394320	132311464	132688272	130490024	134327040
Oleuropein	563.1673	89.3	563.16791:13759374 564.17126:3867991 565.17462:899944	54.82586:1148 98.90193:1186 133.93788:1252 134.38962:1419 137.05856:10482 148.13829:1265 159.04044:5503 159.3685:1407 165.05362:2236 173.01982:1669 203.05077:6541 218.25818:1366 233.03993:6602 247.05536:2737 265.06696:5065 327.0813:7622 350.57516:1486 369.0907:51113 383.10608:11032 385.12225:6526 401.11664:74694 563.16791:190649	1015600	1866218	2647760	5112631	5335046	5316859	15046279	15544386	17812836	4277055	5726492	6087162	10787	3839	10095	124248376	138385904	135493664	223938960	217722000	238640304	109362888	115627328	120007584	154114	58330	114510	82988240	83518896	82301184	83668568	84698392	84120824
Oleuropein-aglycone	401.15512	95.5	401.15582:916553 402.15917:220873 403.16253:82972	54.46852:769 55.38332:879 66.25286:883 67.86411:1113 73.97916:1030 79.05405:3313 95.02532:917 107.04848:6690 124.05081:1791 131.08429:2905 132.60439:1053 144.05569:1407 145.06294:1062 156.0554:4353 159.07874:3339 167.06868:9711 177.42448:1209 183.87282:1035 184.04996:1925 186.06567:1210 187.07336:1351 187.95274:1173 202.0601:1625 205.08311:2071 208.05046:2251 217.08372:6530 219.07939:1657 219.099…	10635	15076	65395	4453691	3923476	4458376	13162294	13273742	14979795	3689166	4525264	4785987	0	6424	0	4297548	4959958	4777728	12578462	11796601	14850346	4188152	4381295	4593376	3581	3015	11691	5403678	4978260	5288798	4751566	5522266	5564240
p-Coumaric acid	165.12587	99.9	165.12587:342395 166.12922:86096 167.13258:205844	50.01565:5539 51.02335:30346 51.02555:2108 52.0313:1813 53.00271:6437 53.039:10709 55.01817:1839 55.05485:2358 61.30217:1738 65.03875:16146 66.04655:21123 67.05443:3295 67.80099:1481 77.03842:9301 78.04653:4168 79.05434:4824 81.03344:1988 81.06982:2093 91.05421:6502 92.41766:1556 93.03345:5430 94.04105:4464 95.04858:16932 105.03273:3955 105.04447:3529 109.06469:2098 110.49367:2015 121.02745:10754…	563426	501914	702807	1225634	987225	1954044	5647536	3761773	2550580	1909816	958963	2970157	478271	534051	353275	1471792	2460352	2917118	3918534	3933280	4331748	1942371	1496040	1868414	689976	887367	343886	1842616	2490465	2309336	1766493	2990790	3887659
p-Coumaroyl glucose	327.28577	100	327.28577:174671 328.28912:44650 329.29248:23106		99387	187917	136866	192575	363594	283365	870211	466346	970897	255478	155957	271671	190742	69632	64446	364967	742744	781022	1189351	907293	1065210	234536	326746	660711	87851	67579	152688	796945	432101	200220	369449	660989	698463
p-Coumaroyl glycolic acid	223.13039	99.6	223.13068:1487251 224.13403:219925 225.13739:890547	53.03898:1990 55.01809:816 55.0546:2167 55.30412:603 60.28524:632 63.40074:658 65.0388:2193 67.05433:1933 79.05428:4265 81.06948:744 91.05392:19118 93.0696:2042 95.04894:2020 103.05394:2506 104.06166:2152 105.06937:3594 107.08498:1188 115.05338:1726 117.06887:4723 118.50893:895 119.08463:31471 131.08475:1309 133.10004:1240 159.11456:840 161.13103:1658 165.06871:945	1670010	920676	977114	8538523	8371512	8996667	18049304	18158710	18733294	7890995	8693554	8963006	656205	538268	750880	8125078	9592926	8570787	17270016	15580197	19810764	8212837	8383974	8698362	717182	362789	233918	9736332	10245980	8880866	9160774	9511149	9984159
p-Coumaroyl malic acid	281.24478	99.7	281.24478:329613 282.24813:356672 283.25149:605492		498664	553841	423384	359227	701361	663172	560758	654409	972769	1508207	419139	436675	536418	577714	538186	667785	519202	493926	431724	382905	488929	200949	225559	424924	388299	385675	482083	901191	667823	679957	619746	302763	312695
p-Coumaroyl tartaric acid	297.16415	99.4	297.16446:792921 298.16781:107807 299.17117:127499	51.33812:753 55.05465:4382 57.07006:2561 61.54494:673 63.57354:830 67.05422:2963 69.06982:1478 78.71488:903 79.05417:1802 79.23745:847 81.06971:3421 81.98738:766 93.06934:1250 95.04916:1524 95.08477:1705 108.41823:970 166.06319:880 166.33145:921 207.6783:939 239.58633:1097 256.26007:1245 268.2886:810 276.85745:992 297.1633:6837 297.23895:1035	377732	324966	326554	158917	126627	166837	138742	197460	173211	285256	122557	95043	142688	181063	130808	12895640	10833218	7014450	9266566	11682862	9414257	19190282	15357121	15865288	14789676	18576662	17949100	7027518	7252158	7169824	6966859	7111204	6696114
Pelargonidin 3-O-(6''-succinyl-glucoside)	533.5246	98.8	533.5246:42040 534.52795:0 535.53131:0		39799	32243	32953	76521	33194	56557	17367	39776	25036	31655	16993	9048	33575	33475	30319	8666	47242	32113	34911	19682	9686	12428	17137	6846	27590	20029	57898	28145	55731	39650	29724	18588	38776
Pelargonidin 3-O-arabinoside	403.28918	99.3	403.28918:114176 404.29253:51091 405.29589:20659		11212	26525	19367	11905	15609	23696	10213	42303	14476	16808	68204	37867	22222	16378	32848	36056	7471	20932	17769	26078	22054	22662	36217	34703	10276	20250	21992	704661	634187	416556	740535	850970	791170
Peonidin 3-O-(6''-acetyl-galactoside)	505.22034	95.1	505.22092:997467 506.22427:210418 507.22763:88892	50.09772:1125 54.3959:1013 55.93021:1092 56.74194:946 114.86385:1216 115.02211:1255 140.9391:1116 161.75291:1104 183.74928:1125 188.61281:1090 278.91489:1102 453.77469:1642 505.22073:76578	144689	178938	174071	6735352	4903198	7257254	15049368	14187825	10160929	6039134	6961734	5259992	9844	0	0	5310363	5637416	7839758	15545699	10610217	12206273	4338722	5048632	5045731	0	0	2516	7878348	7732687	7386445	7387516	7696052	7503950
Peonidin 3-O-diglucoside-5-O-glucoside	787.32788	88.3	787.32788:106300 788.33123:0 789.33459:26763		9688	4845	12596	46548	47669	41943	310032	330326	331550	29723	22593	61295	4477	0	5665	18518	44137	25808	228175	259930	147859	11804	42490	50016	4636	16886	6687	40768	54759	67463	29950	54578	63784
Petunidin 3-O-rhamnoside	447.76141	89.1	447.76141:44312 448.76476:0 449.76812:0		24311	19113	20206	38343	33040	52663	28489	16859	23521	17747	27636	93203	9030	4915	1843	112002	111432	80558	45602	78524	95116	75172	94076	55450	103243	102557	134409	61022	83481	80824	73273	71496	41616
Phloretin 2'-O-xylosyl-glucoside	569.30817	95.5	569.30817:82975 570.31152:0 571.31488:0		169229	148902	146996	201190	183668	117295	176869	84984	88256	180603	165086	258475	183276	177118	204848	281499	285140	265969	153346	108594	338848	273186	164309	163666	130554	243382	291405	262193	233885	277089	240313	187646	241339
Phloridzin	437.38098	99.8	437.38098:39745 438.38433:17077 439.38769:0		83859	127345	57561	92101	28314	46350	180182	121171	96799	85986	62098	70323	100980	73503	161121	114442	121690	46884	93987	82278	74385	78033	164154	49881	72072	82948	84010	100517	186405	142535	240670	193090	71344
Phlorin	289.16138	99.2	289.16138:251286 290.16473:26967 291.16809:0		188473	317811	132113	696175	786486	596112	1284187	1250910	1303101	537412	424910	595546	144245	126674	146125	330913	821404	379544	966753	966579	1102988	722007	707941	502543	186078	129149	91227	698611	795077	567228	644890	675268	703154
Protocatechuic acid 4-O-glucoside	317.19287	99.4	317.19287:133182 318.19622:24803 319.19958:174252		399076	353563	284630	447902	292078	1000956	438662	250142	156161	148688	720032	633217	195158	427446	187704	558984	619517	281995	667532	465377	328477	819104	165007	831025	315818	573758	502197	590271	423912	797275	739814	629075	880277
Pyrogallol	127.03783	99.5	127.03796:671477 128.04131:387513 129.04467:344338	51.02337:553 53.00254:2360 53.03896:1727 55.01806:1201 56.96507:2016 60.99825:485 61.00142:534 67.93495:873 96.47623:609 106.97276:648 118.56794:595 127.03773:1456	1186590	972204	496458	2015521	4790853	2521841	1092404	3681466	1679000	1567718	5901636	1513903	3947118	2096894	1368898	8727489	4538457	7752220	4405946	5262650	6160334	9607038	4164508	4056016	7728922	8066362	9025441	4551040	7426282	7235470	7843428	6596830	6212354
Quercetin 3-O-(6"-malonyl-glucoside)	551.30054	98.5	551.30054:105254 552.30389:0 553.30725:0		2671	2945	2112	71792	116342	81490	519935	362679	235772	130442	86506	130758	2606	6935	3840	4194	11736	4390	5190	23759	15340	8336	4068	10083	4778	7762	2010	13030	40575	15975	68296	22599	65982
Quercetin 3-O-glucosyl-rhamnosyl-galactoside	773.27515	87.3	773.27515:125143 774.2785:38264 775.28186:31337		15253	7638	2926	17695	12870	8061	42795	9892	65023	29080	7136	16147	5243	14138	14587	133771	208286	113814	340464	407525	573916	161512	92981	99336	11898	7267	2217	28714	52935	71428	40864	35691	69578
Quercetin 3-O-xylosyl-rutinoside	743.26581	88.2	743.26581:144829 744.26916:42618 745.27252:0		17922	27036	17333	107610	230161	104992	563332	696722	587459	84559	241414	173614	10365	30696	7450	231408	171328	158151	535470	475625	588335	133874	210492	229695	8033	8375	3084	204230	163398	184979	122418	211713	166281
Resveratrol 5-O-glucoside	391.20547	96.7	391.20578:228828 392.20913:49879 393.21249:27427	57.06772:1878 57.07023:26258 65.03892:1744 71.08562:26399 71.96662:1174 76.56858:1235 121.02779:8124 149.02196:263165 153.05841:1414 167.03291:8509 178.7218:1229 312.19409:1278 314.86212:1350 368.67282:1336 391.20309:6012	136480	1347865	786997	3954486	3961204	2952510	3095204	3275746	1439752	1702133	2470939	2314636	2062434	1685242	1983433	316516	900686	309666	1179675	1689449	2456157	842614	776918	510596	626791	164493	266123	1295427	2187720	2280553	2041834	2248752	995704
Scopoletin	193.15674	99.9	193.1568:602358 194.16015:241909 195.16351:284737	50.65675:581 53.00238:1003 53.03875:1507 55.01806:713 55.05444:2140 56.96494:716 62.79404:736 65.03858:1639 65.6095:660 66.46708:575 67.05419:2637 69.0698:851 71.04885:919 79.05399:2959 81.06967:1997 91.05386:3787 91.24818:779 95.04868:3352 103.05359:1072 105.06917:3136 119.0838:762 128.43738:698 193.15634:1270	807855	1081288	596399	5079768	5831866	5172862	9887977	9633091	10501977	5014070	2670337	5361394	377231	331165	210095	5058493	5091014	5010986	9954360	9427935	10810635	4726620	5047230	5424616	620453	216068	341157	7732674	7293280	5479243	6322018	5354384	5504629
Secoisolariciresinol	366.31735	98.6	366.31735:346532 367.3207:376798 368.32406:90726		887676	563751	579475	901760	383962	411512	1656842	2289589	854473	576018	583786	846350	790145	2237716	1015600	1373824	870619	1401720	529647	1735165	943216	1343447	1044798	1153941	1944324	1245645	626112	3163567	778293	2000873	2086175	1771000	2403514
Secoisolariciresinol-sesquilignan	559.23297	87.2	559.23364:1639130 560.23699:557685 561.24035:103534	53.48845:1043 55.05455:5271 57.07033:2680 59.04939:1566 61.46116:1013 63.68251:1407 67.0544:11559 68.58388:1266 69.0335:1387 69.06991:3015 71.04927:8192 72.48244:1192 77.13311:1252 79.05422:1250 81.06985:69382 83.08545:1795 85.02816:2042 85.06458:3897 89.05955:1642 93.06498:1022 93.06972:9394 95.04881:4396 95.0852:11167 97.10086:11927 99.0799:1373 105.06945:1965 107.08501:4266 109.02765:2088 109.…	70684	231634	124318	8083387	8737433	8949102	23957788	24757698	30480500	7293955	8719696	9188098	11878	0	4643	8609674	9921364	9456178	23218636	20366510	27364632	7857122	8604028	9060177	0	0	0	9222840	9169635	9161252	8908375	9441155	9125318
Sesamin	355.36426	99.6	355.36508:54809 356.36843:0 357.37179:0	53.00257:4003 54.50133:1560 55.05458:6456 57.07024:46895 67.05448:12969 68.4165:1771 69.07007:9132 69.73133:1507 71.04934:28448 71.08566:23722 80.02585:1678 81.0699:12079 85.06452:1874 85.10098:8053 85.78826:1997 93.03641:2442 95.08511:19593 109.10041:6507 117.4832:1788 161.72534:2096 163.87827:2081 165.06697:1885 193.45779:2037 267.5282:1998 355.28104:38870	118707	168278	117271	191341	183718	160843	170615	213033	201638	297755	206549	294506	267030	230053	174712	300458	89408	93466	159848	203378	337119	166417	170603	217506	182849	170649	148338	375105	250023	226656	180602	143149	356678
Sesaminol 2-O-triglucoside	831.75916	99.7	831.75916:186267 832.76251:24013 833.76587:0		4386	3039	15953	510638	342923	348830	758643	363068	725193	121998	90627	343066	0	0	0	753957	670297	438929	499586	1068292	488894	369187	339509	263118	0	0	0	482302	322157	507098	309457	256498	559878
Sesamol	139.11026	99.9	139.11026:402671 140.11361:79878 141.11697:142382	50.01543:886 50.7318:509 51.02322:2639 52.03104:1196 53.00252:3999 53.03884:2153 55.01803:649 55.05446:1310 55.93454:623 56.96505:58846 65.03848:711 67.05453:660 68.0256:2597 72.93716:689 74.97506:1128 79.01754:659 81.033:646 91.05357:830 94.67338:635 95.01205:2789 95.04862:1020 99.74232:667 124.04213:746 139.03674:1077	404219	740906	1051613	2641220	753888	983659	7155928	3291382	7330876	3023844	3549190	3347140	609816	559238	996319	2868214	2947461	2087398	6199692	5991438	6311768	1307569	2423247	3932746	813094	611003	952856	4753066	4575780	3940262	2811978	3385954	4418186
Sesamolin	371.35962	99.6	371.35995:1039778 372.3633:422719 373.36666:147533	52.33292:861 55.05455:13369 57.07019:14275 59.04935:2983 59.12204:775 62.38802:938 67.05433:1052 71.08561:11456 74.9908:836 83.04892:15596 95.0851:1417 98.81227:948 101.05914:37607 111.04318:16487 121.6833:1226 129.05334:15254 147.06354:10914 169.19638:1115 174.10728:1056 191.44864:1051 201.09041:1018 201.56956:964 310.30795:4090 352.89737:1005	2733620	2659211	3767738	2847286	2587376	4154148	5323292	2322060	5181471	2374468	1511831	1470059	978254	2975490	2307076	2511516	1718964	7160334	4581748	5539286	3372452	1544124	2907675	4845661	5890911	4808730	4256681	3359842	6245415	4025546	5159556	4339100	2128881
Sinapaldehyde	209.15143	99.6	209.15169:668620 210.15504:488751 211.1584:495528	53.00266:1015 53.03908:2592 55.05463:11994 56.96501:800 65.03886:1250 67.05455:3301 75.53915:692 78.04642:1221 79.05413:4696 81.06997:3075 83.04917:2255 83.08559:1139 91.05406:3487 93.06956:1385 95.04895:2971 97.06465:1606 100.65185:761 103.05418:868 105.06969:1362 109.06441:1646 116.01071:765 122.05531:702 123.95522:732 128.07808:738 143.9753:763 167.1424:1249	431203	394960	547101	4462218	4754646	4429732	10268124	9557197	9795871	3801976	4142864	3936179	509129	331403	448356	4198718	4471964	4184136	9457921	9112408	10846384	4085909	4078659	4788314	404995	332389	245446	5407804	5249855	4606254	4819939	4826634	4709314
Sinapaldehyde	209.15164	99.7	209.15166:2052215 210.15501:259855 211.15837:364084	53.00262:1227 53.03899:4668 54.23167:834 55.0182:923 55.05462:14524 59.04927:2095 65.0387:2338 67.05444:5331 69.06987:2440 70.02422:874 78.47432:838 79.05412:9993 81.0697:2731 83.04897:2993 91.05391:9733 93.06947:8956 95.04871:10929 105.04424:1602 105.06925:3899 107.08483:2659 109.0638:2504 118.57736:994 119.61081:1101 121.1002:4555 123.4103:952 130.26759:856 154.98579:926 155.34488:906 161.37062…	967728	1037613	1446946	11871263	12771250	13229628	30877328	34150832	32468688	10699422	13306010	13437220	702326	373770	523350	8802600	9397501	9052175	21213904	17252322	23937066	7792710	8718986	8955867	1108709	366712	582468	11979486	12827661	10577369	16291277	12551910	11910742
Sinapic acid	225.14624	99.6	225.14638:609430 226.14973:138869 227.15309:331962	51.02341:5433 53.00253:2437 53.03904:16178 54.48653:984 55.01823:3166 55.05453:3305 63.82572:770 65.03885:10283 66.0467:5765 67.0544:22765 71.04913:1089 77.0385:8824 79.05415:8965 81.03345:1943 81.06976:3328 83.04883:884 86.05951:910 91.0538:5224 92.69369:1013 94.04088:4534 95.01243:926 95.04875:53903 105.03299:8799 105.04398:7592 107.04846:1562 109.06429:1795 111.04377:1031 121.02751:4176 122.03…	840452	1123008	530451	5384266	2622400	4473860	7545660	3911961	9277919	5101401	2489060	4137500	637693	740099	406858	3669781	2466274	4083803	6206157	5524098	6345934	4168967	3781683	3580068	320001	490697	985505	4880250	4683732	4769048	4443158	4610174	4246442
Syringaldehyde	183.08449	99	183.08464:45961732 184.08799:3310836 185.09135:680639	53.00265:23647 53.0389:39788 55.01822:32265 55.0545:55757 57.03365:62572 61.02856:24269 63.35543:19442 69.03367:207107 72.93672:21959 74.13036:19998 85.02838:23693 110.75684:20517	20043614	19614486	19410942	304358112	307445568	326624928	731494656	691029568	818383552	286774464	318943232	340129408	943360	448131	440439	301113408	342379072	325968320	654111168	636750080	753612672	291884480	305106528	320435552	2329670	1604248	2635747	347311392	351214336	343639808	341083616	335633888	343426080
Syringic acid	199.17871	100	199.17859:1369729 200.18194:228046 201.1853:40119	51.02332:910 51.60707:951 53.0025:1453 53.03885:4514 53.85126:793 55.01813:1741 55.05208:1521 55.05458:28160 55.63167:861 63.05651:933 64.32212:877 65.03855:4827 66.13802:875 67.05424:3711 68.02592:926 69.03327:971 72.04438:7695 74.09641:20909 75.90259:1030 78.46413:1159 79.05409:7321 83.04889:4961 83.08528:2594 91.05392:1065 95.04861:4386 95.75787:1143 97.00705:4872 97.83703:1004 100.07506:3160 …	4727460	4435518	3726567	4230365	4838817	5403652	4814288	4242959	2237056	3678283	5179604	3528216	6721542	1672697	7116711	5826426	1915385	14174830	7663366	1270315	2334715	4016442	3467054	2322863	1975914	4260353	1959603	9977915	2732544	3829774	2776776	12949667	5586674
Tetramethylscutellarein	343.32837	99.7	343.32773:1052153 344.33108:132470 345.33444:274299	50.08776:749 51.71803:708 53.48183:677 55.05449:2661 57.07013:5908 57.95425:1047 60.08107:5020 63.26091:794 67.05427:2354 69.06983:1731 71.07288:3855 71.08555:2681 79.0541:1490 79.44065:843 81.06961:2557 82.06498:12754 85.10122:1202 86.0961:21277 87.25647:985 93.0361:1041 93.0695:2321 95.0724:1385 95.08503:3339 96.08013:3121 98.98353:2735 105.92546:929 107.08545:933 124.99866:17992 129.48288:947 …	5069856	2618457	2366665	3980047	4534654	3143031	3436639	2722713	2405378	1567501	5059614	3970689	1347961	1109632	5525648	1679681	420413	375630	711597	447108	514577	659643	303183	375077	446379	536912	682908	7648674	4258108	8451564	6658653	248220	514307
Trans-Resveratrol	229.22527	100	229.22527:187356 230.22862:0 231.23198:56501		1502027	1296206	1160220	1248740	979253	814034	905090	700524	222626	773492	684771	1298651	772808	1369218	1322927	1148226	767790	768817	712923	608432	1270218	559252	979047	1345444	1597191	1754437	1766900	1628932	785254	1285055	1415806	1769494	1192721
Umbelliferone	163.13123	99.9	163.13121:1268885 164.13456:166917 165.13792:174113	51.02296:571 53.03881:2118 63.94236:1841 65.03854:879 69.97673:620 70.74021:678 79.05393:1460 80.37696:597 80.94476:2258 91.05389:3713 95.04854:2833 95.74441:745 101.02527:675 115.05339:1180 116.96515:7242 117.05672:688 139.98053:1104	9005065	6893070	7225578	6109078	2106050	24725578	21101578	17897816	5662540	3209174	13077338	6973526	9825653	6381150	20226292	31606592	35382928	35004968	6519232	8367038	8156276	7635610	7888940	6444634	8473694	10456445	13900394	19596584	12717528	18821282	22055662	22432956	21379222
Vitisin A	561.24646	95.3	561.24695:663012 562.2503:192971 563.25366:31804	53.17294:1053 57.88724:1089 63.97311:1193 64.27855:1239 70.06528:1980 71.66322:1266 71.96733:1180 88.98799:1250 129.10097:1400 222.2478:1408 241.51929:1248 267.9241:1299 335.09167:10754 503.21164:1743 531.42761:1371 561.24744:68288	176351	179985	169115	3140934	3289616	3343391	7106928	5522470	5314631	2794053	3266918	3415754	7580	0	3424	2492437	2792013	2693556	5583854	4934004	6245650	2244646	2477010	2515454	1767	2260	4531	3297524	3387778	2700767	2733529	2996542	2943649
