# Supplementary material for: Development of Coated PLA Films Containing a Commercial Olive Leaf Extract for the Food Packaging Sector
Source: Antioxidants (Basel). 2024 Apr 26;13(5):519. doi: 10.3390/antiox13050519 (PMC11117849; doi:10.3390/antiox13050519)
Supplement: Supplementary file 1 [file antioxidants-13-00519-s001.zip › Table S2.csv]

Metabolite name	Class	Subclass	Olive leaf extract
			OL 1	OL2	OL 3
Cyanidin 3-O-(3'',6''-O-dimalonyl-glucoside)	Flavonoids	Anthocyanins	69706	82155	126290
Cyanidin 3-O-(6''-dioxalyl-glucoside)	Flavonoids	Anthocyanins	255623	208269	136245
Cyanidin 3-O-(6''-malonyl-3''-glucosyl-glucoside)	Flavonoids	Anthocyanins	20038	6700	8899
Cyanidin 3-O-(6''-succinyl-glucoside)	Flavonoids	Anthocyanins	6382395	78982	7400234
Delphinidin 3-O-(6''-acetyl-galactoside)	Flavonoids	Anthocyanins	70775	121808	52729
Delphinidin 3-O-galactoside	Flavonoids	Anthocyanins	666503	4891	612782
Malvidin 3-O-galactoside	Flavonoids	Anthocyanins	10613	24661	9821
Pelargonidin 3-O-(6''-succinyl-glucoside)	Flavonoids	Anthocyanins	39799	32243	32953
Pelargonidin 3-O-arabinoside	Flavonoids	Anthocyanins	11212	26525	19367
Peonidin 3-O-(6''-acetyl-galactoside)	Flavonoids	Anthocyanins	144689	178938	174071
Peonidin 3-O-diglucoside-5-O-glucoside	Flavonoids	Anthocyanins	9688	4845	12596
Petunidin 3-O-rhamnoside	Flavonoids	Anthocyanins	24311	19113	20206
Vitisin A	Flavonoids	Anthocyanins	176351	179985	169115
Malvidin 3,5-diglucoside	Flavonoids	Anthocyanins	4193595	214019	1689832
			1.21E+07	1.18E+06	1.05E+07
		ug/L Cyanidin Eq.	52.2	5.1	45.2
3-Hydroxyphloretin 2'-O-glucoside	Flavonoids	Dihydrochalcones	92171	87178	78675
Phloretin 2'-O-xylosyl-glucoside	Flavonoids	Dihydrochalcones	169229	148902	146996
Phloridzin	Flavonoids	Dihydrochalcones	83859	127345	57561
6-Geranylnaringenin	Flavonoids	Flavanones	1169635	1103206	1071792
8-Prenylnaringenin	Flavonoids	Flavanones	264682	456779	218268
Naringenin 7-O-glucoside	Flavonoids	Flavanones	15349	3496	3504
Naringin 6'-malonate	Flavonoids	Flavanones	7695560	8043923	8249231
Apigenin	Flavonoids	Flavones	17507446	17236666	16878672
Apigenin 6,8-C-arabinoside-C-glucoside	Flavonoids	Flavones	3681	2501	8157
Apigenin 6-C-glucoside	Flavonoids	Flavones	159989	161450	328814
Apigenin 7-O-(6''-malonyl-apiosyl-glucoside)	Flavonoids	Flavones	4096	16704	19736
Apigenin 7-O-glucuronide	Flavonoids	Flavones	12478	72674	48722
Chrysoeriol 7-O-(6''-malonyl-glucoside)	Flavonoids	Flavones	18468	17638	5279
Diosmin	Flavonoids	Flavones	2563	3463	2494
Isorhoifolin	Flavonoids	Flavones	9456	9328	11772
Luteolin	Flavonoids	Flavones	2309	1919	2124
Luteolin 7-O-(2-apiosyl-6-malonyl)-glucoside	Flavonoids	Flavones	4449881	3825947	3948257
Luteolin 7-O-glucoside	Flavonoids	Flavones	677199	1106736	1405476
Luteolin 7-O-malonyl-glucoside	Flavonoids	Flavones	521963	573273	598522
Luteolin 7-O-rutinoside	Flavonoids	Flavones	22393	57502	33661
Tetramethylscutellarein	Flavonoids	Flavones	5069856	2618457	2366665
Isoformononetin	Flavonoids	Flavones	18523	32470	91938
2',7-Dihydroxy-4',5'-dimethoxyisoflavone	Flavonoids	Isoflavonoids	813188	7301464	3950662
2'-Hydroxyformononetin	Flavonoids	Isoflavonoids	3521005	3728423	3659357
3',4',7-Trihydroxyisoflavan	Flavonoids	Isoflavonoids	5202	8429	2435
6''-O-Acetylglycitin	Flavonoids	Isoflavonoids	131952	187882	202883
6''-O-Malonyldaidzin	Flavonoids	Isoflavonoids	422039	401360	394511
6''-O-Malonylgenistin	Flavonoids	Isoflavonoids	236873	162447	240608
6''-O-Malonylglycitin	Flavonoids	Isoflavonoids	71053	90010	81926
Daidzin	Flavonoids	Isoflavonoids	127135	130719	165074
Formononetin	Flavonoids	Isoflavonoids	364680	565273	541492
			4.37E+07	4.83E+07	4.48E+07
		ug/L Luteolin Eq.	52.2	57.8	53.6
(-)-Epicatechin 3-O-gallate	Flavonoids	Flavanols	6928	8844	32395
(-)-Epicatechin-(2a-7)(4a-8)-epicatechin 3-O-galactoside	Flavonoids	Flavanols	44441	75874	92572
(-)-Epigallocatechin 3-O-gallate	Flavonoids	Flavanols	4345	2217	4073
(-)-Epigallocatechin 3-O-glucuronide	Flavonoids	Flavanols	68037	70260	79721
(+)-Catechin	Flavonoids	Flavanols	461256	692093	101265
(+)-Catechin 3-O-gallate	Flavonoids	Flavanols	865388	99800	1139094
(+)-Gallocatechin	Flavonoids	Flavanols	1109856	1121203	1028630
4',4"-O-Dimethylepigallocatechin 3-O-gallate	Flavonoids	Flavanols	27504	27138	45911
4'-O-Methyl-(-)-epigallocatechin 3'-O-glucuronide	Flavonoids	Flavanols	12950	9543	6212
4'-O-Methylepigallocatechin	Flavonoids	Flavanols	286356	56958	361660
4''-O-Methylepigallocatechin 3-O-gallate	Flavonoids	Flavanols	83323	128252	64064
			2.97E+06	2.29E+06	2.96E+06
		ug/L Catechin Eq.	19.2	14.8	19.1
Dihydroquercetin	Flavonoids	Dihydroflavonols	9400	11687	34433
Isorhamnetin 3-O-glucoside 7-O-rhamnoside	Flavonoids	Flavonols	218317	135222	79361
Kaempferide	Flavonoids	Flavonols	157727	141231	175095
Kaempferol 3-O-(2''-rhamnosyl-6''-acetyl-galactoside) 7-O-rhamnoside	Flavonoids	Flavonols	25989	16819	8475
Kaempferol 3-O-(6''-acetyl-galactoside) 7-O-rhamnoside	Flavonoids	Flavonols	3248136	58211	3402968
Kaempferol 3-O-acetyl-glucoside	Flavonoids	Flavonols	22230	34499	31666
Kaempferol 3-O-glucosyl-rhamnosyl-galactoside	Flavonoids	Flavonols	10080	26122	30118
Kaempferol 3-O-rhamnoside	Flavonoids	Flavonols	356228	403221	64400
Kaempferol 7-O-glucoside	Flavonoids	Flavonols	1126256	1643792	1414984
Myricetin	Flavonoids	Flavonols	76561	99651	42242
Myricetin 3-O-galactoside	Flavonoids	Flavonols	21205	57849	48600
Quercetin 3-O-(6"-malonyl-glucoside)	Flavonoids	Flavonols	2671	2945	2112
Quercetin 3-O-glucosyl-rhamnosyl-galactoside	Flavonoids	Flavonols	15253	7638	2926
Quercetin 3-O-xylosyl-rutinoside	Flavonoids	Flavonols	17922	27036	17333
			5.31E+06	2.67E+06	5.35E+06
		ug/L Quercetin Eq.	9.4	4.7	9.5
Anhydro-secoisolariciresinol	Lignans	Lignans	185506	160019	141745
Lariciresinol-sesquilignan	Lignans	Lignans	48766	7903	18210
Matairesinol	Lignans	Lignans	52285	16697	28059
Secoisolariciresinol	Lignans	Lignans	887676	563751	579475
Secoisolariciresinol-sesquilignan	Lignans	Lignans	70684	231634	124318
Sesamin	Lignans	Lignans	118707	168278	117271
Sesaminol 2-O-triglucoside	Lignans	Lignans	4386	3039	15953
Sesamol	Lignans	Lignans	404219	740906	1051613
Sesamolin	Lignans	Lignans	2733620	2659211	3767738
			4.51E+06	4.55E+06	5.84E+06
3,4-DHPEA-EA	Other polyphenols	Tyrosols	67590	386106	679967
3,4-Dihydroxyphenylglycol	Other polyphenols	Other polyphenols	35410684	14234879	30805800
3-Methylcatechol	Other polyphenols	Alkylphenols	3129697	5532453	2352651
4-Ethylcatechol	Other polyphenols	Alkylphenols	53644	81631	30413
4-Ethylphenol	Other polyphenols	Alkylphenols	1250029	231853	298306
4-Hydroxybenzaldehyde	Other polyphenols	Hydroxybenzaldehydes	745984	503983	574393
4-Hydroxycoumarin	Other polyphenols	Hydroxycoumarins	517254	1046238	665701
4-Vinylphenol	Other polyphenols	Alkylphenols	347719	206271	368057
5-Heneicosenylresorcinol	Other polyphenols	Alkylphenols	43869	19039	57448
5-Heneicosylresorcinol	Other polyphenols	Alkylphenols	84294	4181	67484
5-Nonadecenylresorcinol	Other polyphenols	Alkylphenols	80898	151888	109086
5-Pentacosenylresorcinol	Other polyphenols	Alkylphenols	7767	3343	3633
5-Tricosylresorcinol	Other polyphenols	Alkylphenols	598759	415533	322116
Acetyl eugenol	Other polyphenols	Hydroxyphenylpropenes	2617943	2463820	2541290
Arbutin	Other polyphenols	Other polyphenols	27301898	28828998	12126887
Carnosol	Other polyphenols	Phenolic terpenes	232537	124442	221995
Catechol	Other polyphenols	Other polyphenols	398108	756362	539201
Coumarin	Other polyphenols	Hydroxycoumarins	177502	227441	163231
Curcumin	Other polyphenols	Curcuminoids	5302281	5108395	3896216
Demethyloleuropein	Other polyphenols	Tyrosols	41090	110196	93410
Esculetin	Other polyphenols	Hydroxycoumarins	521823	583135	641032
Esculin	Other polyphenols	Hydroxycoumarins	4515199	4093792	5231952
Ferulaldehyde	Other polyphenols	Hydroxycinnamaldehydes	62807	97483	81724
Gallic aldehyde	Other polyphenols	Hydroxybenzaldehydes	1774452	2264447	1306285
Hydroxytyrosol	Other polyphenols	Tyrosols	317114	81957	183706
Isopimpinellin	Other polyphenols	Furanocoumarins	268910	144077	95854
Ligstroside-aglycone	Other polyphenols	Tyrosols	10938	59505	39057
Oleuropein	Other polyphenols	Tyrosols	1015600	1866218	2647760
Oleuropein-aglycone	Other polyphenols	Tyrosols	10635	15076	65395
Phlorin	Other polyphenols	Other polyphenols	188473	317811	132113
Pyrogallol	Other polyphenols	Other polyphenols	1186590	972204	496458
Scopoletin	Other polyphenols	Hydroxycoumarins	807855	1081288	596399
Sinapaldehyde	Other polyphenols	Hydroxycinnamaldehydes	431203	394960	547101
Sinapaldehyde	Other polyphenols	Hydroxycinnamaldehydes	967728	1037613	1446946
Syringaldehyde	Other polyphenols	Hydroxybenzaldehydes	20043614	19614486	19410942
Umbelliferone	Other polyphenols	Hydroxycoumarins	9005065	6893070	7225578
(S)-[6]-Gingerol	Other polyphenols	Hydroxyphenylpropenes	11412567	11586120	11910813
			1.31E+08	1.12E+08	1.08E+08
1,2'-Disinapoyl-2-feruloylgentiobiose	Phenolic acids	Hydroxycinnamic acids	2337	2696	15935
1-Sinapoyl-2,2'-diferuloylgentiobiose	Phenolic acids	Hydroxycinnamic acids	8966	38834	36251
1-Sinapoyl-2-feruloylgentiobiose	Phenolic acids	Hydroxycinnamic acids	3001	17633	15834
24-Methylcholestanol ferulate	Phenolic acids	Hydroxycinnamic acids	3151	3790	4526
24-Methylcholesterol ferulate	Phenolic acids	Hydroxycinnamic acids	41907	49224	102002
3,4-Diferuloylquinic acid	Phenolic acids	Hydroxycinnamic acids	3567	5905	3494
3,5-Dicaffeoylquinic acid	Phenolic acids	Hydroxycinnamic acids	7702	5360	2477
3-Caffeoylquinic acid	Phenolic acids	Hydroxycinnamic acids	30581	81738	202325
3-O-Methylgallic acid	Phenolic acids	Hydroxybenzoic acids	14275222	3461650	14293092
4-Hydroxybenzoic acid 4-O-glucoside	Phenolic acids	Hydroxybenzoic acids	49950528	7035662	33567932
5-5'-Dehydrodiferulic acid	Phenolic acids	Hydroxycinnamic acids	256471	277191	246982
5-Feruloylquinic acid	Phenolic acids	Hydroxycinnamic acids	22583	693478	722063
5-O-Galloylquinic acid	Phenolic acids	Hydroxybenzoic acids	31425	30062	55147
5-p-Coumaroylquinic acid	Phenolic acids	Hydroxycinnamic acids	4523062	4564925	6064910
5-Sinapoylquinic acid	Phenolic acids	Hydroxycinnamic acids	50674	88534	103670
Avenanthramide 2c	Phenolic acids	Hydroxycinnamic acids	1107633	2040360	2134625
Avenanthramide 2f	Phenolic acids	Hydroxycinnamic acids	15415837	16253770	16236593
Avenanthramide 2p	Phenolic acids	Hydroxycinnamic acids	166296	140798	351144
Caffeic acid	Phenolic acids	Hydroxycinnamic acids	147458	179483	62190
Caffeoyl aspartic acid	Phenolic acids	Hydroxycinnamic acids	689765	1726071	891332
Caffeoyl glucose	Phenolic acids	Hydroxycinnamic acids	23601502	25745826	22127042
Caffeoyl tartaric acid	Phenolic acids	Hydroxycinnamic acids	100292	114618	106569
Cinnamic acid	Phenolic acids	Hydroxycinnamic acids	498855	706061	971899
Dihydrosinapic acid	Phenolic acids	Hydroxyphenylpropanoic acids	3201960	2868518	5269186
Ellagic acid arabinoside	Phenolic acids	Hydroxybenzoic acids	4634295	2946790	4518180
Ferulic acid	Phenolic acids	Hydroxycinnamic acids	272952	299391	246635
Feruloyl tartaric acid	Phenolic acids	Hydroxycinnamic acids	29670458	17796612	4451170
Gallagic acid	Phenolic acids	Hydroxybenzoic acids	26298	7294	13953
Gallic acid	Phenolic acids	Hydroxybenzoic acids	43845896	24139204	11751529
Gallic acid 3-O-gallate	Phenolic acids	Hydroxybenzoic acids	79293	107158	145149
Gallic acid 4-O-glucoside	Phenolic acids	Hydroxybenzoic acids	45829	94052	83574
Hydroxycaffeic acid	Phenolic acids	Hydroxycinnamic acids	938483	1816330	925448
p-Coumaric acid	Phenolic acids	Hydroxycinnamic acids	563426	501914	702807
p-Coumaroyl glucose	Phenolic acids	Hydroxycinnamic acids	99387	187917	136866
p-Coumaroyl glycolic acid	Phenolic acids	Hydroxycinnamic acids	1670010	920676	977114
p-Coumaroyl malic acid	Phenolic acids	Hydroxycinnamic acids	498664	553841	423384
p-Coumaroyl tartaric acid	Phenolic acids	Hydroxycinnamic acids	377732	324966	326554
Protocatechuic acid 4-O-glucoside	Phenolic acids	Hydroxybenzoic acids	399076	353563	284630
Sinapic acid	Phenolic acids	Hydroxycinnamic acids	840452	1123008	530451
Syringic acid	Phenolic acids	Hydroxybenzoic acids	4727460	4435518	3726567
			2.03E+08	1.22E+08	1.33E+08
		ug/L Ferulic acid Eq.	931.7	559.2	610.2
Dihydroresveratrol	Stilbenes	Stilbenes	1248936	798386	2001603
e-Viniferin	Stilbenes	Stilbenes	1087004	1068730	1043891
Resveratrol 5-O-glucoside	Stilbenes	Stilbenes	136480	1347865	786997
Trans-Resveratrol	Stilbenes	Stilbenes	1502027	1296206	1160220
			3.97E+06	4.51E+06	4.99E+06
		ug/L Resveratrol Eq.	40.8	46.3	51.2
